# Supplementary material for: Ventral midbrain astrocytes display unique physiological features and sensitivity to dopamine D2 receptor signaling
Source: PubMed Central journal article supplement (PMC6300565; doi:10.1038/s41386-018-0151-4), 2018-07-13
Supplement: 41386_2018_151_MOESM8_ESM.pdf [file 41386_2018_151_MOESM8_ESM.pdf]

|         | VM - Means  | SEM      | SEM/Mean |
|---------|-------------|----------|----------|
| Gm10800 | 8950.800875 | 3815.079 | 0.426228 |
| Gm26870 | 2920.068893 | 1234.344 | 0.422711 |
| Gm21738 | 2604.026582 | 1065.157 | 0.409042 |
| Malat1  | 2141.974938 | 422.4085 | 0.197205 |
| Gm10801 | 1611.142217 | 686.2774 | 0.425957 |
| mt-Co1  | 938.1960715 | 139.1066 | 0.14827  |
| mt-Nd4  | 924.3118279 | 169.6937 | 0.183589 |
| mt-Cytb | 745.801716  | 117.6571 | 0.157759 |
| mt-Nd1  | 690.6017828 | 58.35416 | 0.084498 |
| mt-Co2  | 490.8186578 | 62.27044 | 0.126871 |
| mt-Atp6 | 470.0121692 | 74.24531 | 0.157965 |
| mt-Nd5  | 439.6182004 | 55.37792 | 0.125968 |
| mt-Nd2  | 329.5720914 | 85.71234 | 0.260072 |
| Ndrg2   | 305.8438252 | 40.02246 | 0.130859 |
| mt-Nd4l | 279.7879479 | 25.26596 | 0.090304 |
| mt-Co3  | 239.0129274 | 88.96851 | 0.372233 |
| Sparcl1 | 218.3495837 | 33.27333 | 0.152386 |
| mt-Atp8 | 200.3285947 | 59.72824 | 0.298151 |
| Atp1b2  | 149.7959917 | 26.59868 | 0.177566 |
| Slc6a11 | 144.3096461 | 17.80757 | 0.123398 |
| Cst3    | 136.459157  | 53.06689 | 0.388885 |
| Gm10721 | 108.5561244 | 50.92877 | 0.469147 |
| Ntsr2   | 90.69555274 | 24.03959 | 0.265058 |
| Atp1a2  | 90.62706668 | 16.53665 | 0.182469 |
| mt-Nd6  | 88.25427272 | 40.07246 | 0.454057 |
| Mt2     | 84.18285077 | 28.07107 | 0.333454 |
| Slc1a2  | 79.53513884 | 11.63019 | 0.146227 |
| Ckb     | 77.27314262 | 19.14541 | 0.247763 |
| Cd81    | 76.38696207 | 13.49054 | 0.176608 |
| Sparc   | 70.47259629 | 14.40915 | 0.204465 |
| Cpe     | 68.35222532 | 18.86766 | 0.276036 |
| Lars2   | 67.54867169 | 13.85653 | 0.205134 |
| Aldoc   | 66.21455499 | 7.596099 | 0.114719 |
| Apoe    | 65.1984476  | 17.80335 | 0.273064 |
| Scd2    | 63.07980318 | 15.39306 | 0.244025 |
| Gstm1   | 60.17300621 | 12.13391 | 0.20165  |
| Itih3   | 58.75454631 | 14.6445  | 0.249249 |
| Tecr    | 56.31435324 | 10.30865 | 0.183055 |
| Ppap2b  | 51.39812499 | 11.22522 | 0.218397 |
| Ptprz1  | 50.89462177 | 6.449412 | 0.126721 |
| Gm3764  | 50.34304856 | 8.544644 | 0.169728 |
| Glud1   | 49.10828094 | 9.120549 | 0.185723 |
| Bcan    | 48.3134345  | 8.648216 | 0.179002 |
| Snrnp70 | 47.7834649  | 11.91631 | 0.249381 |
| Acsl3   | 47.24000759 | 7.612725 | 0.16115  |
| Gja1    | 45.75529788 | 12.12244 | 0.264941 |

|           |             |          |          |
|-----------|-------------|----------|----------|
| Gm21292   | 43.54036849 | 13.98761 | 0.321256 |
| Slc4a4    | 43.37072588 | 8.927463 | 0.205841 |
| Hnrnpa2b1 | 42.24314676 | 13.16089 | 0.311551 |
| mt-Nd3    | 41.85778201 | 11.9006  | 0.28431  |
| Mid1      | 40.04589124 | 17.26185 | 0.431052 |
| Gpr37l1   | 39.92556038 | 16.59305 | 0.4156   |
| Slc6a1    | 39.41991829 | 8.780026 | 0.222731 |
| Glul      | 38.79249423 | 7.642886 | 0.19702  |
| Aqp4      | 37.48386663 | 6.850747 | 0.182765 |
| Slc27a1   | 36.55149642 | 6.849037 | 0.18738  |
| Ddx17     | 36.43492399 | 6.50095  | 0.178426 |
| Prnp      | 36.43202721 | 16.41555 | 0.45058  |
| Tmem47    | 34.18536582 | 9.97479  | 0.291785 |
| Agt       | 33.8884542  | 16.22233 | 0.478698 |
| Gjb6      | 33.57805586 | 8.634765 | 0.257155 |
| Atp5b     | 33.30354641 | 5.108802 | 0.153401 |
| Gm21820   | 32.91219808 | 13.10113 | 0.398063 |
| Nrbp2     | 32.7082042  | 8.489226 | 0.259544 |
| S1pr1     | 32.19236905 | 6.771957 | 0.210359 |
| Gm26818   | 32.09562411 | 7.127471 | 0.22207  |
| Clu       | 31.9564967  | 6.400279 | 0.200281 |
| Ttyh1     | 31.71790443 | 1.874549 | 0.059101 |
| Dbi       | 31.47116608 | 10.46638 | 0.33257  |
| Appl2     | 31.27113969 | 9.07367  | 0.290161 |
| Csrp1     | 30.9995247  | 11.54755 | 0.372507 |
| Srsf5     | 30.92636754 | 8.218905 | 0.265757 |
| Sepp1     | 30.83223078 | 4.9988   | 0.162129 |
| Nnat      | 27.7333371  | 13.33917 | 0.48098  |
| Trim9     | 27.46961238 | 2.932824 | 0.106766 |
| Psap      | 27.21712854 | 9.689425 | 0.356005 |
| Acsbg1    | 27.16075067 | 9.265151 | 0.341123 |
| Gpm6a     | 26.70650719 | 3.174088 | 0.118851 |
| Gm10715   | 26.23474337 | 12.96509 | 0.494195 |
| Ywhae     | 26.21919903 | 3.597346 | 0.137203 |
| Fabp7     | 25.96899514 | 4.029741 | 0.155175 |
| Atp13a4   | 24.80659319 | 6.678654 | 0.269229 |
| Ptn       | 24.72174774 | 3.65225  | 0.147734 |
| Ntrk2     | 24.37211248 | 2.100712 | 0.086193 |
| Leng8     | 24.36253653 | 3.634145 | 0.149169 |
| Nwd1      | 24.23776462 | 6.570972 | 0.271105 |
| Cwc22     | 24.00055357 | 10.51204 | 0.437992 |
| Scg3      | 23.96733989 | 6.308653 | 0.263219 |
| Cat       | 23.88138491 | 9.595786 | 0.40181  |
| Ncam1     | 23.79716789 | 1.124068 | 0.047235 |
| Slc1a3    | 23.73334857 | 2.741683 | 0.11552  |
| Macf1     | 23.3468277  | 3.8811   | 0.166237 |
| Gm20594   | 23.29467046 | 8.067801 | 0.346337 |

|           |             |          |          |
|-----------|-------------|----------|----------|
| Gdpd2     | 22.72255116 | 5.761347 | 0.253552 |
| Ldhb      | 22.48775426 | 4.71768  | 0.209789 |
| Ptch1     | 22.41102012 | 7.346943 | 0.327827 |
| Serpine2  | 22.23841572 | 4.609825 | 0.207291 |
| Kcnj10    | 22.00009623 | 4.870612 | 0.22139  |
| Tril      | 21.71144637 | 10.34472 | 0.476464 |
| Ubc       | 21.21826258 | 8.958785 | 0.42222  |
| Car2      | 20.93916147 | 6.029496 | 0.287953 |
| Gas5      | 20.92902629 | 4.708696 | 0.224984 |
| Atp2a2    | 20.83955631 | 6.655477 | 0.319368 |
| Fads1     | 20.80746673 | 4.221084 | 0.202864 |
| Ncan      | 20.55531192 | 3.830715 | 0.186361 |
| Psd2      | 19.85524099 | 6.78091  | 0.341517 |
| Tpp1      | 19.79662032 | 6.637817 | 0.335301 |
| Lamp1     | 19.72157458 | 5.06932  | 0.257044 |
| Lcat      | 19.56155961 | 6.648184 | 0.33986  |
| Mat2a     | 19.17303013 | 6.503753 | 0.339214 |
| Slc39a12  | 19.08769994 | 5.219202 | 0.273433 |
| Srrm2     | 18.858092   | 3.755819 | 0.199162 |
| Acsl6     | 18.83926073 | 3.904365 | 0.207246 |
| Rnasek    | 18.4812458  | 6.673781 | 0.361111 |
| Fam107a   | 18.46670175 | 6.083954 | 0.329455 |
| Son       | 18.43655455 | 4.29779  | 0.233112 |
| Luzp2     | 18.36806519 | 4.57894  | 0.249288 |
| Nr1d1     | 17.9474333  | 4.404021 | 0.245384 |
| Gpld1     | 17.7360766  | 5.199379 | 0.293153 |
| Hsp90b1   | 17.68450174 | 6.264732 | 0.35425  |
| Slc25a4   | 17.61714568 | 5.034118 | 0.285751 |
| Dtna      | 17.50481966 | 5.596063 | 0.319687 |
| Mtss1l    | 17.4153044  | 8.624363 | 0.495217 |
| Sat1      | 17.40061317 | 4.623856 | 0.265729 |
| 6-Mar     | 17.22029301 | 3.559663 | 0.206713 |
| Ogt       | 17.11343148 | 4.594314 | 0.268462 |
| Elovl5    | 16.99456822 | 4.143453 | 0.24381  |
| Ednrb     | 16.9815467  | 4.033016 | 0.237494 |
| Ddx5      | 16.79786453 | 5.589835 | 0.332771 |
| Tuba1a    | 16.77047747 | 5.286841 | 0.315247 |
| Fxyd1     | 16.75367377 | 6.465462 | 0.385913 |
| Ddhd1     | 16.74608308 | 3.401975 | 0.20315  |
| Igsf11    | 16.4744848  | 7.165195 | 0.434927 |
| Kidins220 | 16.38921746 | 2.994223 | 0.182695 |
| Dazap2    | 16.37121712 | 7.953951 | 0.48585  |
| Actb      | 16.23494528 | 5.125073 | 0.315682 |
| Hsp90ab1  | 16.16959445 | 4.219756 | 0.260969 |
| Ahcyl1    | 16.09802594 | 4.557519 | 0.28311  |
| Neat1     | 16.09139503 | 6.684183 | 0.415389 |
| Fads2     | 16.00668047 | 2.631698 | 0.164412 |

|           |             |          |          |
|-----------|-------------|----------|----------|
| Trpm3     | 15.98945772 | 2.970451 | 0.185776 |
| Tst       | 15.97804524 | 4.608585 | 0.288432 |
| Hspd1     | 15.83852433 | 6.316062 | 0.398778 |
| Itm2b     | 15.7214986  | 4.27815  | 0.272121 |
| Sash1     | 15.69828686 | 4.901637 | 0.31224  |
| Itm2c     | 15.67378257 | 7.469244 | 0.476544 |
| Hepacam   | 15.49370016 | 3.775858 | 0.243703 |
| Il18      | 15.39827839 | 5.64106  | 0.366344 |
| Cnp       | 15.35930669 | 7.115262 | 0.463254 |
| Pnn       | 15.15134323 | 2.076607 | 0.137058 |
| Mrgprx1   | 14.89854699 | 5.274274 | 0.354013 |
| Ctsl      | 14.79530989 | 6.60004  | 0.44609  |
| Gm10557   | 14.73047544 | 6.987434 | 0.474352 |
| Lrig1     | 14.71001585 | 2.504047 | 0.170227 |
| Kif1a     | 14.52146599 | 2.723718 | 0.187565 |
| Camk2g    | 14.4391867  | 3.164844 | 0.219184 |
| Clip3     | 14.4166844  | 5.073611 | 0.351926 |
| 2310022B  | 14.20469856 | 4.358895 | 0.306863 |
| Gdi1      | 14.1052244  | 2.754684 | 0.195295 |
| Phka1     | 14.0546958  | 2.211152 | 0.157325 |
| Spon1     | 13.96303545 | 1.802733 | 0.129108 |
| Daam2     | 13.92333661 | 5.463105 | 0.39237  |
| 5031439G  | 13.91322586 | 2.003838 | 0.144024 |
| Adcyap1r1 | 13.9107764  | 3.485088 | 0.250532 |
| Luc7l3    | 13.81005673 | 3.779143 | 0.273651 |
| Rac1      | 13.76031887 | 5.717657 | 0.415518 |
| Arhgap5   | 13.74971985 | 6.681032 | 0.485903 |
| Asrgl1    | 13.71877135 | 6.254317 | 0.455895 |
| Atp5a1    | 13.54084871 | 4.150469 | 0.306515 |
| Cyp2j9    | 13.31619635 | 5.283957 | 0.396807 |
| Slc41a1   | 13.23866171 | 4.637253 | 0.350281 |
| C130071C  | 13.20358222 | 2.948584 | 0.223317 |
| Prrc2c    | 13.10502259 | 1.939137 | 0.147969 |
| Pla2g7    | 13.06593902 | 2.519324 | 0.192816 |
| F3        | 13.01437967 | 4.539409 | 0.348799 |
| Vegfa     | 12.92545246 | 3.881398 | 0.300291 |
| Cyp2j6    | 12.89995199 | 2.893389 | 0.224295 |
| Gm14410   | 12.86292369 | 4.467132 | 0.347287 |
| Tspan3    | 12.72108325 | 4.380138 | 0.344321 |
| Clk1      | 12.68085385 | 2.93893  | 0.231761 |
| Dctn4     | 12.6618315  | 6.178418 | 0.487956 |
| Sod1      | 12.65124308 | 5.79621  | 0.458153 |
| Paics     | 12.61027778 | 4.707677 | 0.373321 |
| Nxf1      | 12.52277917 | 5.843411 | 0.466622 |
| Gstm5     | 12.40868008 | 5.193885 | 0.418569 |
| Pmp22     | 12.30367937 | 4.736908 | 0.384999 |
| Gpd2      | 12.26922314 | 2.321598 | 0.189221 |

|          |             |          |          |
|----------|-------------|----------|----------|
| Prdx6    | 12.18286937 | 1.716039 | 0.140857 |
| Srsf3    | 12.08979141 | 2.810443 | 0.232464 |
| 4833420G | 12.05259569 | 5.505443 | 0.456785 |
| Slc7a10  | 11.90617624 | 3.129838 | 0.262875 |
| Gm21811  | 11.84079536 | 3.172239 | 0.267908 |
| Gpm6b    | 11.79403621 | 2.654157 | 0.225042 |
| Rbmx     | 11.73442978 | 4.01796  | 0.342408 |
| Slc2a1   | 11.64119415 | 4.13067  | 0.354832 |
| Fermt2   | 11.50744532 | 4.240753 | 0.368523 |
| Gm21847  | 11.47980736 | 3.20589  | 0.279263 |
| Gm21882  | 11.44921428 | 5.255668 | 0.459042 |
| Rab7     | 11.3707625  | 2.51415  | 0.221107 |
| Hnrnpk   | 11.29280927 | 1.574761 | 0.139448 |
| Timp3    | 11.27980835 | 3.103734 | 0.275158 |
| Arhgef12 | 11.23643478 | 2.240398 | 0.199387 |
| Fgfr3    | 11.08778057 | 4.101264 | 0.36989  |
| Pcdh9    | 11.08452726 | 1.874796 | 0.169136 |
| Trak1    | 11.04265679 | 2.136338 | 0.193462 |
| Eif4a2   | 10.92022847 | 2.78336  | 0.254881 |
| Ewsr1    | 10.85268588 | 4.143749 | 0.381818 |
| Ctsd     | 10.7884817  | 2.898408 | 0.268658 |
| Aplp2    | 10.77847542 | 5.211897 | 0.483547 |
| Rtn3     | 10.76307009 | 3.289275 | 0.305607 |
| Mpp6     | 10.7185238  | 5.279942 | 0.4926   |
| Cetn3    | 10.5227015  | 5.122428 | 0.486798 |
| Mrfap1   | 10.4210399  | 3.499581 | 0.335819 |
| Gapdh    | 10.36657708 | 4.918908 | 0.474497 |
| Gjc3     | 10.3290897  | 2.3438   | 0.226913 |
| Padi2    | 10.29340631 | 3.800032 | 0.369171 |
| Spire1   | 10.26057515 | 3.462756 | 0.337482 |
| 7-Sep    | 10.23025864 | 3.80293  | 0.371733 |
| Clasp2   | 10.13554329 | 0.981698 | 0.096857 |
| Calm1    | 10.0802548  | 2.231232 | 0.221347 |
| Gpam     | 10.06701232 | 3.813205 | 0.378782 |
| Vezf1    | 10.00230906 | 2.391514 | 0.239096 |
| Lsamp    | 9.997401744 | 1.34512  | 0.134547 |
| Spry2    | 9.985689768 | 3.249305 | 0.325396 |
| Sema6d   | 9.97109111  | 1.877161 | 0.18826  |
| Paxbp1   | 9.906290155 | 2.75241  | 0.277845 |
| Canx     | 9.89192342  | 1.969497 | 0.199102 |
| Clk4     | 9.859617007 | 1.130748 | 0.114685 |
| Slc14a1  | 9.810238665 | 2.992322 | 0.30502  |
| Gabbr2   | 9.734012981 | 3.893173 | 0.399956 |
| Cnbp     | 9.719303576 | 3.387625 | 0.348546 |
| Smarcc2  | 9.669398695 | 2.412723 | 0.249522 |
| Pitpnc1  | 9.656757132 | 2.302189 | 0.238402 |
| Lgi1     | 9.593743462 | 1.810537 | 0.188721 |

|           |             |          |          |
|-----------|-------------|----------|----------|
| 4930402H: | 9.576935712 | 2.009252 | 0.209801 |
| Gabbr1    | 9.551474378 | 2.510127 | 0.2628   |
| Sox9      | 9.547619083 | 2.235288 | 0.23412  |
| Fam213a   | 9.543551557 | 4.3467   | 0.455459 |
| Slc25a23  | 9.531589404 | 2.684386 | 0.28163  |
| Sdha      | 9.402057905 | 3.693585 | 0.392849 |
| Tnik      | 9.396840223 | 2.576727 | 0.274212 |
| Etnppl    | 9.391811906 | 2.21821  | 0.236186 |
| Ccdc88a   | 9.360819529 | 0.675573 | 0.07217  |
| Pygm      | 9.356469304 | 4.15866  | 0.444469 |
| Gm26825   | 9.315823522 | 2.488579 | 0.267135 |
| Cyp51     | 9.295689576 | 3.801696 | 0.408974 |
| Adrbk2    | 9.268739977 | 2.044629 | 0.220594 |
| Pygb      | 9.230364877 | 3.704555 | 0.401344 |
| Nckap1    | 9.174243694 | 1.381585 | 0.150594 |
| Rbm12b1   | 9.144804064 | 3.943416 | 0.431219 |
| Spag9     | 9.138906447 | 2.695173 | 0.294912 |
| Chchd10   | 9.112916019 | 2.646716 | 0.290436 |
| Zfp871    | 9.095026327 | 1.724303 | 0.189587 |
| Laptm4a   | 9.070833791 | 2.14604  | 0.236587 |
| Pbxip1    | 9.029393484 | 1.926608 | 0.213371 |
| Kcnn2     | 8.974229507 | 1.337802 | 0.149071 |
| Rab21     | 8.969847789 | 4.449657 | 0.496068 |
| Cox8a     | 8.961279555 | 3.864949 | 0.431294 |
| Trps1     | 8.949744807 | 1.433726 | 0.160197 |
| Fmn2      | 8.826732156 | 2.930356 | 0.331986 |
| Cd164     | 8.81907058  | 2.786379 | 0.315949 |
| Grina     | 8.793702902 | 3.856154 | 0.438513 |
| B2m       | 8.780773052 | 1.58021  | 0.179963 |
| Paqr6     | 8.77405454  | 1.81241  | 0.206565 |
| Rps29     | 8.7451656   | 2.637331 | 0.301576 |
| Prpf38b   | 8.726170439 | 4.29229  | 0.491887 |
| Fam21     | 8.682696598 | 3.342428 | 0.384953 |
| Ppp1r3c   | 8.678933999 | 2.814701 | 0.324314 |
| Psenen    | 8.664721194 | 3.211167 | 0.370602 |
| Mlc1      | 8.647657105 | 3.492876 | 0.40391  |
| Gabrb1    | 8.609829159 | 2.562635 | 0.297641 |
| Chtop     | 8.601674375 | 2.637207 | 0.306592 |
| Tprkb     | 8.600963046 | 3.844102 | 0.446939 |
| Syt11     | 8.557925834 | 2.321685 | 0.271291 |
| Zcchc7    | 8.550733031 | 2.111913 | 0.246986 |
| Folh1     | 8.522322766 | 2.209946 | 0.259313 |
| Mettl7a1  | 8.509598338 | 2.130884 | 0.250409 |
| Lrp1      | 8.500733446 | 1.974792 | 0.232308 |
| Insig1    | 8.480329133 | 2.449161 | 0.288805 |
| Rbbp9     | 8.446212924 | 3.75071  | 0.44407  |
| Actg1     | 8.4355053   | 3.092804 | 0.366641 |

|          |             |          |          |
|----------|-------------|----------|----------|
| Sox2ot   | 8.424381014 | 2.399676 | 0.284849 |
| Tmem229c | 8.390177609 | 3.113067 | 0.371037 |
| Atl2     | 8.376378568 | 2.786128 | 0.332617 |
| Astn1    | 8.337529454 | 2.601589 | 0.312034 |
| Nrxn1    | 8.301569304 | 1.179873 | 0.142126 |
| Mfge8    | 8.292263306 | 2.642576 | 0.31868  |
| Paqr8    | 8.255062625 | 2.536097 | 0.307217 |
| Gatad2b  | 8.252061786 | 3.781128 | 0.458204 |
| Cyp2d22  | 8.247883443 | 3.428553 | 0.415689 |
| Pdk2     | 8.200771397 | 2.02766  | 0.247252 |
| Zfp825   | 8.185831309 | 2.370344 | 0.289567 |
| Chd9     | 8.1733075   | 2.386758 | 0.292019 |
| Jam2     | 8.14659842  | 2.349427 | 0.288394 |
| Lamp2    | 8.143568131 | 2.565077 | 0.314982 |
| Srsf1    | 8.123772016 | 1.512765 | 0.186215 |
| Srek1    | 8.102756373 | 3.983506 | 0.491624 |
| Wasf3    | 8.093046709 | 2.406876 | 0.297401 |
| Kif1b    | 8.09077536  | 0.950873 | 0.117526 |
| Tjp1     | 8.08095935  | 2.779151 | 0.343914 |
| Arrb2    | 8.055672403 | 3.775381 | 0.468661 |
| Slc1a4   | 8.036293757 | 3.345937 | 0.416353 |
| Tbc1d19  | 8.022263484 | 3.61873  | 0.451086 |
| Hnrnph1  | 8.016724975 | 2.524233 | 0.314871 |
| Fry      | 8.008917993 | 1.377315 | 0.171973 |
| Uba1     | 7.987862765 | 2.613218 | 0.327149 |
| Bclaf1   | 7.942412348 | 0.968479 | 0.121938 |
| Ctnnd2   | 7.933085656 | 2.045794 | 0.257881 |
| Zfp207   | 7.907009844 | 2.284623 | 0.288936 |
| Gria2    | 7.895162655 | 1.721395 | 0.218032 |
| Igfbp5   | 7.892667943 | 2.879994 | 0.364895 |
| Slc6a9   | 7.887425565 | 2.828739 | 0.358639 |
| Mical2   | 7.883848916 | 0.630344 | 0.079954 |
| Rps25    | 7.880347883 | 3.164669 | 0.40159  |
| Scd1     | 7.816332149 | 2.265115 | 0.289793 |
| Ywhaz    | 7.805367377 | 2.027264 | 0.259727 |
| Myo6     | 7.75061342  | 2.396777 | 0.309237 |
| Snapin   | 7.737669282 | 3.111047 | 0.402065 |
| Ntrk3    | 7.706671405 | 2.392281 | 0.310417 |
| Slc7a2   | 7.706535478 | 2.340149 | 0.303658 |
| Rps17    | 7.680409496 | 3.369416 | 0.438703 |
| Al464131 | 7.672068267 | 3.549526 | 0.462656 |
| Mmd2     | 7.660719542 | 2.358124 | 0.30782  |
| Rsrp1    | 7.656983062 | 3.665783 | 0.47875  |
| Cdk2ap1  | 7.633099557 | 3.530855 | 0.462572 |
| Trmt112  | 7.609660023 | 3.715295 | 0.488234 |
| Pigs     | 7.603470148 | 2.384157 | 0.313562 |
| Zbed6    | 7.581492861 | 2.565322 | 0.338366 |

|          |             |          |          |
|----------|-------------|----------|----------|
| Sfxn5    | 7.559478988 | 1.741647 | 0.230393 |
| Trib2    | 7.555045718 | 2.813345 | 0.37238  |
| Rnd2     | 7.549563258 | 1.996759 | 0.264487 |
| 2610203C | 7.535478908 | 2.213144 | 0.293697 |
| Serinc1  | 7.519515357 | 1.77683  | 0.236296 |
| Enho     | 7.513434542 | 3.047411 | 0.405595 |
| Sorl1    | 7.507027462 | 2.564295 | 0.341586 |
| Apc      | 7.496544804 | 2.021512 | 0.269659 |
| Stx16    | 7.48792702  | 2.894098 | 0.386502 |
| Trp53bp2 | 7.484080361 | 2.516778 | 0.336284 |
| Tubb2a   | 7.483041129 | 2.142182 | 0.286272 |
| Kcnd2    | 7.481781402 | 1.866384 | 0.249457 |
| Kcnt1    | 7.475913603 | 1.957342 | 0.26182  |
| Pfklp    | 7.392514253 | 2.920088 | 0.395006 |
| Jmjd1c   | 7.374144557 | 1.58219  | 0.214559 |
| Ncoa4    | 7.340908103 | 3.260728 | 0.444186 |
| Npm1     | 7.339688734 | 2.873547 | 0.391508 |
| Fam214a  | 7.31220258  | 1.267842 | 0.173387 |
| Cs       | 7.269443483 | 2.238643 | 0.307952 |
| Rps9     | 7.263763621 | 2.250537 | 0.309831 |
| Rps6kb2  | 7.243058088 | 3.529158 | 0.487247 |
| Epc1     | 7.205200904 | 2.22127  | 0.308287 |
| Gnao1    | 7.193456061 | 2.597761 | 0.361128 |
| Ocr1     | 7.176353614 | 2.15585  | 0.30041  |
| Peg3     | 7.135748207 | 1.562372 | 0.21895  |
| Ncoa6    | 7.134745679 | 2.779564 | 0.389581 |
| Cadm2    | 7.113839234 | 1.555581 | 0.21867  |
| Slc38a3  | 7.112447101 | 1.831651 | 0.257528 |
| Arglu1   | 7.091199241 | 2.748302 | 0.387565 |
| Eps8     | 7.082970805 | 2.658759 | 0.375373 |
| Cyp7b1   | 7.078604157 | 2.576001 | 0.363914 |
| Atxn2    | 7.060770365 | 3.026073 | 0.428575 |
| Gm20918  | 7.057778135 | 2.817069 | 0.399144 |
| Farp1    | 7.034195647 | 1.916532 | 0.272459 |
| Zkscan3  | 7.025033468 | 2.558212 | 0.364157 |
| Polr2k   | 7.015927736 | 3.502518 | 0.499224 |
| Etv5     | 6.974009113 | 2.48039  | 0.355662 |
| Astx5    | 6.966082053 | 2.428426 | 0.348607 |
| Ap1p1    | 6.94878108  | 3.192097 | 0.459375 |
| 49305050 | 6.920194604 | 2.826457 | 0.408436 |
| Eps15    | 6.911944695 | 1.689127 | 0.244378 |
| Slc25a5  | 6.878786036 | 2.680604 | 0.389691 |
| Fam184a  | 6.872037672 | 2.87161  | 0.417869 |
| Zcchc24  | 6.844361389 | 2.379704 | 0.347688 |
| Arhgef4  | 6.813985113 | 1.903367 | 0.279332 |
| Klf7     | 6.806799609 | 2.973604 | 0.436858 |
| Prkci    | 6.805410414 | 3.154678 | 0.463554 |



|           |             |          |          |
|-----------|-------------|----------|----------|
| Gm21092   | 6.798206798 | 3.264873 | 0.480255 |
| Eif1      | 6.786920593 | 2.31073  | 0.340468 |
| Serinc3   | 6.780478602 | 2.029026 | 0.299245 |
| Arhgap21  | 6.771545986 | 1.750158 | 0.258458 |
| 2610507B  | 6.743516539 | 2.774409 | 0.411419 |
| Gm20830   | 6.737969807 | 3.172205 | 0.470795 |
| Cbx5      | 6.72323333  | 2.353671 | 0.35008  |
| Rbm5      | 6.716200379 | 2.005577 | 0.298618 |
| Syne1     | 6.714385836 | 3.085098 | 0.459476 |
| Pgm2      | 6.70579735  | 2.272197 | 0.338841 |
| Cpeb4     | 6.696891244 | 2.685942 | 0.401073 |
| Ccnl2     | 6.688524846 | 3.22348  | 0.481942 |
| Mmp14     | 6.66398646  | 2.082831 | 0.31255  |
| Ubr5      | 6.662829537 | 1.091543 | 0.163826 |
| Cnot3     | 6.639389703 | 2.78784  | 0.419894 |
| Fdft1     | 6.627632479 | 2.796627 | 0.421965 |
| Pgk1      | 6.623159554 | 2.564276 | 0.387168 |
| Zscan26   | 6.613483841 | 3.102548 | 0.469125 |
| Omg       | 6.611203213 | 1.301685 | 0.196891 |
| Kmt2c     | 6.598562406 | 1.10437  | 0.167365 |
| Gm28035   | 6.591210986 | 2.981601 | 0.45236  |
| Dnajc18   | 6.591024553 | 2.114081 | 0.320752 |
| Atp6ap1   | 6.572507012 | 2.500984 | 0.380522 |
| Rab31     | 6.567251066 | 2.497278 | 0.380262 |
| Acss1     | 6.554844668 | 1.990908 | 0.303731 |
| Ppp1r12a  | 6.553409175 | 2.251678 | 0.343589 |
| Pdia3     | 6.552550207 | 1.929581 | 0.294478 |
| Shisa9    | 6.544700998 | 3.24382  | 0.495641 |
| Cdkn1b    | 6.526060326 | 2.296356 | 0.351875 |
| Pbx1      | 6.509239665 | 2.62625  | 0.403465 |
| Cd63      | 6.436302621 | 2.895168 | 0.449819 |
| Rpl10a    | 6.42157264  | 2.552578 | 0.3975   |
| Idh3g     | 6.420082964 | 2.926265 | 0.455799 |
| Ppargc1a  | 6.416077694 | 1.241308 | 0.193468 |
| Tmem144   | 6.398472596 | 2.300827 | 0.35959  |
| App       | 6.365518776 | 3.02169  | 0.474697 |
| Sfpq      | 6.354042318 | 1.96719  | 0.309597 |
| 9330159F1 | 6.344284299 | 2.345386 | 0.369685 |
| Dmd       | 6.335951525 | 0.731035 | 0.115379 |
| Sar1b     | 6.328112903 | 1.886714 | 0.298148 |
| Klf9      | 6.326933224 | 1.265425 | 0.200006 |
| Aldh1l1   | 6.30813424  | 2.546823 | 0.403736 |
| Tmem184c  | 6.307776993 | 2.241393 | 0.355338 |
| Ank2      | 6.300484579 | 0.883103 | 0.140164 |
| Tmc7      | 6.291327698 | 1.194621 | 0.189884 |
| Slc3a2    | 6.285532293 | 1.390203 | 0.221175 |
| Eif2s3y   | 6.267999891 | 1.50301  | 0.239791 |

|           |             |          |          |
|-----------|-------------|----------|----------|
| Cdh20     | 6.232892336 | 1.836371 | 0.294626 |
| 9330151L1 | 6.223037701 | 2.543578 | 0.408736 |
| Rnf5      | 6.209924795 | 2.755864 | 0.443784 |
| Lpcat3    | 6.203478961 | 2.63042  | 0.424023 |
| Znrf3     | 6.19827167  | 1.730025 | 0.279114 |
| Atl3      | 6.180643989 | 1.602744 | 0.259317 |
| Nsmf      | 6.169416405 | 2.593677 | 0.420409 |
| Erdr1     | 6.153263315 | 1.930653 | 0.313761 |
| Akap11    | 6.131926397 | 1.231037 | 0.200759 |
| Srrm1     | 6.121898857 | 2.857215 | 0.46672  |
| Xpr1      | 6.0982619   | 0.505714 | 0.082927 |
| Rbbp6     | 6.089924609 | 2.006082 | 0.32941  |
| Hnrnpa3   | 6.086644785 | 0.995537 | 0.163561 |
| Tspyl2    | 6.060138369 | 2.51608  | 0.415185 |
| Rnf24     | 6.038007409 | 1.881583 | 0.311623 |
| Dstn      | 6.02691143  | 2.460527 | 0.408257 |
| Dpp8      | 6.026522678 | 1.985338 | 0.329433 |
| Soat1     | 6.024589759 | 1.227161 | 0.203692 |
| Amy1      | 6.020640739 | 1.577903 | 0.262082 |
| Arl8b     | 6.01223871  | 2.875144 | 0.478215 |
| Neo1      | 6.001599596 | 1.716323 | 0.285978 |
| Hes5      | 5.999150193 | 2.994632 | 0.499176 |
| Eef2      | 5.997072682 | 2.811297 | 0.468778 |
| Cdc37l1   | 5.985822061 | 1.792001 | 0.299374 |
| Mdm4      | 5.984528854 | 0.410392 | 0.068576 |
| Rpl4      | 5.967513655 | 2.785925 | 0.466848 |
| Msi2      | 5.952841588 | 1.703303 | 0.286133 |
| Ktn1      | 5.951294686 | 2.377287 | 0.399457 |
| Zeb1      | 5.93370675  | 1.188847 | 0.200355 |
| Pkm       | 5.928977554 | 2.587512 | 0.436418 |
| Lfng      | 5.924874782 | 2.253369 | 0.380323 |
| Hipk2     | 5.918776283 | 1.3005   | 0.219725 |
| Clk3      | 5.913121743 | 2.904805 | 0.491247 |
| Pcdh7     | 5.895551398 | 1.588387 | 0.269421 |
| Pik3r1    | 5.891914118 | 1.480359 | 0.251253 |
| Luc7l2    | 5.838479875 | 2.00122  | 0.342764 |
| Adhfe1    | 5.834732711 | 1.43891  | 0.246611 |
| Capn7     | 5.821381196 | 2.11572  | 0.36344  |
| Gm12359   | 5.807320392 | 2.165598 | 0.372908 |
| Sall2     | 5.796129142 | 0.987087 | 0.170301 |
| Ptpra     | 5.772728467 | 1.228735 | 0.212852 |
| Med13     | 5.754541337 | 1.393021 | 0.242073 |
| Lxn       | 5.715272523 | 2.358252 | 0.412623 |
| 1500009CC | 5.710227766 | 2.432148 | 0.425928 |
| Chkb      | 5.707750803 | 2.47789  | 0.434127 |
| Slmo2     | 5.704164628 | 1.958545 | 0.343354 |
| Ralgds    | 5.703028378 | 2.069744 | 0.36292  |

|          |             |          |          |
|----------|-------------|----------|----------|
| Bhlhe40  | 5.688024263 | 2.576456 | 0.452962 |
| Xpo1     | 5.67282288  | 1.643993 | 0.289802 |
| Srsf11   | 5.670009765 | 1.92754  | 0.339954 |
| Nedd4    | 5.660570348 | 1.931838 | 0.34128  |
| Senp6    | 5.643489236 | 1.789104 | 0.317021 |
| 2810403A | 5.632062473 | 0.68156  | 0.121014 |
| Abat     | 5.61949247  | 2.459384 | 0.437652 |
| Mga      | 5.614928884 | 1.203079 | 0.214264 |
| Npas3    | 5.606467417 | 0.741422 | 0.132244 |
| Egfr     | 5.591492273 | 1.801515 | 0.322189 |
| Slc25a3  | 5.586966751 | 1.519865 | 0.272038 |
| Set      | 5.58408463  | 1.160544 | 0.207831 |
| Rab10    | 5.582384208 | 0.827963 | 0.148317 |
| Prpf4b   | 5.56707395  | 1.73703  | 0.312018 |
| Uqcrrfs1 | 5.566065371 | 2.481569 | 0.445839 |
| Nars     | 5.557704249 | 2.7491   | 0.494647 |
| Sirpa    | 5.545739186 | 1.955497 | 0.352612 |
| Pea15a   | 5.542286525 | 1.850169 | 0.333828 |
| Kank1    | 5.53950167  | 2.299571 | 0.415122 |
| Tor1aip1 | 5.530880286 | 2.664239 | 0.481703 |
| Gxylt1   | 5.517828452 | 2.234015 | 0.404872 |
| Vcam1    | 5.511977786 | 2.342054 | 0.424903 |
| Zbtb20   | 5.505138905 | 2.281624 | 0.414454 |
| Pnp      | 5.495891564 | 2.455334 | 0.446758 |
| Ttc14    | 5.494387562 | 0.864439 | 0.157331 |
| Cox5a    | 5.480197547 | 1.85264  | 0.338061 |
| Fnbp1    | 5.468397793 | 0.439773 | 0.080421 |
| Cntfr    | 5.459517133 | 2.546127 | 0.466365 |
| Ubxn4    | 5.448727751 | 2.54753  | 0.467546 |
| Fat3     | 5.431705998 | 0.776436 | 0.142945 |
| Phyhd1   | 5.423830604 | 2.339023 | 0.431249 |
| Zfc3h1   | 5.400469567 | 1.995131 | 0.369437 |
| Csde1    | 5.39392019  | 2.610376 | 0.483948 |
| Cry2     | 5.3890497   | 2.349306 | 0.435941 |
| Rbm12b2  | 5.386293274 | 1.539905 | 0.285893 |
| Eif5     | 5.382051608 | 1.999583 | 0.371528 |
| Gm17555  | 5.376298848 | 2.315943 | 0.430769 |
| Scarb2   | 5.364969999 | 1.596033 | 0.297491 |
| Atp13a5  | 5.361531867 | 1.831955 | 0.341685 |
| Pafah1b1 | 5.355554683 | 2.155751 | 0.402526 |
| Tubb2b   | 5.336006134 | 2.178001 | 0.408171 |
| Sqle     | 5.325571777 | 2.463855 | 0.462646 |
| Gm28986  | 5.320272666 | 2.298134 | 0.431958 |
| Idh1     | 5.310031794 | 1.923015 | 0.362148 |
| Aldoa    | 5.302934514 | 1.972827 | 0.372026 |
| Hook3    | 5.295316854 | 1.292776 | 0.244136 |
| Mfn1     | 5.291132245 | 1.522013 | 0.287653 |

|          |             |          |          |
|----------|-------------|----------|----------|
| Cldn10   | 5.287400282 | 2.023342 | 0.382672 |
| Prpf19   | 5.27859492  | 1.683352 | 0.318902 |
| Tmbim6   | 5.277508182 | 2.448522 | 0.463954 |
| Eif3a    | 5.270336923 | 1.398451 | 0.265344 |
| Hif1a    | 5.267970744 | 1.26376  | 0.239895 |
| Capn2    | 5.236167901 | 1.943515 | 0.371171 |
| Dock4    | 5.225886703 | 0.612115 | 0.117131 |
| Arap2    | 5.224947922 | 1.493416 | 0.285824 |
| Mfap1a   | 5.207576889 | 2.3428   | 0.449883 |
| Usp24    | 5.206335944 | 1.346815 | 0.258688 |
| Sf3b1    | 5.205025776 | 0.41369  | 0.079479 |
| Ppm1g    | 5.198771403 | 2.020935 | 0.388733 |
| Prdx1    | 5.180226519 | 1.529565 | 0.29527  |
| Srgap3   | 5.175927883 | 1.840501 | 0.355589 |
| Igsf1    | 5.170956351 | 1.450751 | 0.280558 |
| Acbd5    | 5.168700336 | 1.055612 | 0.204232 |
| Oxct1    | 5.163103623 | 1.291657 | 0.250171 |
| Utrn     | 5.157507059 | 0.199976 | 0.038774 |
| Eno1     | 5.139541094 | 1.618839 | 0.314977 |
| Dnm1l    | 5.130588228 | 1.890768 | 0.368529 |
| Lnpep    | 5.121999137 | 1.384698 | 0.270343 |
| Capns1   | 5.11554328  | 1.729782 | 0.338142 |
| Sdc2     | 5.114577233 | 1.21813  | 0.238168 |
| Fam193b  | 5.110688773 | 1.926004 | 0.376858 |
| Tsc2     | 5.102326779 | 1.942529 | 0.380714 |
| Gtf3c2   | 5.096389168 | 2.403204 | 0.47155  |
| Dtx3     | 5.076351514 | 2.473203 | 0.487201 |
| Prpf39   | 5.061695397 | 1.9406   | 0.383389 |
| Fbxo44   | 5.044296819 | 2.242454 | 0.444552 |
| Cep85l   | 5.042321252 | 1.238395 | 0.2456   |
| Inpp1    | 5.041757666 | 2.145888 | 0.425623 |
| Tab2     | 5.025761825 | 1.483188 | 0.295117 |
| Gm21750  | 5.01302113  | 1.720356 | 0.343177 |
| Elovl2   | 5.011620481 | 1.201635 | 0.23977  |
| Col9a3   | 5.011515444 | 2.361647 | 0.471244 |
| Ctnna1   | 5.009221229 | 2.172417 | 0.433684 |
| Gm2163   | 4.998246859 | 2.157449 | 0.431641 |
| Usp11    | 4.997632947 | 2.344358 | 0.469094 |
| Smc3     | 4.991174864 | 1.815025 | 0.363647 |
| Rbm39    | 4.990097098 | 1.462225 | 0.293025 |
| Rsrc2    | 4.990069139 | 0.687342 | 0.137742 |
| Aldh6a1  | 4.97703431  | 1.766605 | 0.354951 |
| Gm12940  | 4.975091928 | 2.042304 | 0.410506 |
| Itgb8    | 4.973741949 | 0.852527 | 0.171406 |
| Atf1     | 4.973211077 | 1.640812 | 0.32993  |
| Ssbp1    | 4.962834232 | 1.643291 | 0.331119 |
| Hsd17b11 | 4.95538598  | 1.153093 | 0.232695 |

|           |             |          |          |
|-----------|-------------|----------|----------|
| 2210016F1 | 4.95492346  | 1.942701 | 0.392075 |
| Ndufc2    | 4.947554216 | 1.844646 | 0.37284  |
| Nrcam     | 4.938489818 | 0.668364 | 0.135338 |
| Slc25a18  | 4.938257688 | 1.841075 | 0.372819 |
| Fmo1      | 4.931600861 | 1.573735 | 0.319112 |
| Nipbl     | 4.918399276 | 1.285557 | 0.261377 |
| Prex2     | 4.915306859 | 1.118408 | 0.227536 |
| Fbxl3     | 4.906170416 | 0.601522 | 0.122605 |
| Wsb1      | 4.903328218 | 1.326102 | 0.270449 |
| Socs7     | 4.893992001 | 1.519748 | 0.310533 |
| Nfat5     | 4.887517009 | 1.280381 | 0.26197  |
| Tlcd1     | 4.883357434 | 0.785689 | 0.160891 |
| Olig2     | 4.882625065 | 1.769167 | 0.362339 |
| Ssfa2     | 4.880513297 | 1.972192 | 0.404095 |
| Gna12     | 4.868685757 | 1.878744 | 0.385883 |
| Tuba1b    | 4.853514826 | 2.023909 | 0.416999 |
| Sesn3     | 4.844458914 | 1.477076 | 0.3049   |
| Ak3       | 4.841609182 | 1.717687 | 0.354776 |
| Elmo2     | 4.83843478  | 2.087844 | 0.431512 |
| Tmem106l  | 4.836556931 | 0.368998 | 0.076294 |
| Fmnl2     | 4.829101502 | 1.92209  | 0.398022 |
| Desi2     | 4.821631775 | 0.863117 | 0.179009 |
| Mertk     | 4.818944236 | 1.86548  | 0.387114 |
| Chfr      | 4.799296438 | 2.011785 | 0.419183 |
| Rev3l     | 4.794527609 | 0.448749 | 0.093596 |
| Zmiz1     | 4.790933331 | 2.297546 | 0.479561 |
| Atp11b    | 4.783767794 | 1.192979 | 0.249381 |
| Ralgapa1  | 4.779791852 | 1.404537 | 0.293849 |
| Caml      | 4.7783522   | 2.376737 | 0.497397 |
| Tlr3      | 4.776876993 | 1.680182 | 0.351732 |
| Birc2     | 4.772315942 | 2.193166 | 0.45956  |
| Ankrd28   | 4.770992239 | 1.483414 | 0.310924 |
| Htra1     | 4.757423501 | 1.739099 | 0.365555 |
| Fgd6      | 4.755226095 | 1.373763 | 0.288895 |
| Slc29a3   | 4.748309239 | 0.534757 | 0.112621 |
| Pcdh10    | 4.724745869 | 1.761926 | 0.372915 |
| Sesn1     | 4.724027409 | 2.293271 | 0.485448 |
| Atp5g3    | 4.72317076  | 1.435194 | 0.303862 |
| Ctso      | 4.719627864 | 2.199076 | 0.465943 |
| Pdlim5    | 4.710980397 | 1.537665 | 0.3264   |
| Sorbs1    | 4.710470186 | 1.689818 | 0.358736 |
| Nktr      | 4.702657766 | 1.262936 | 0.268558 |
| Abca1     | 4.702393687 | 1.543711 | 0.328282 |
| Paqr7     | 4.699772081 | 1.321713 | 0.281229 |
| Rtn4      | 4.696642347 | 1.511048 | 0.321729 |
| Celsr2    | 4.692686767 | 1.535775 | 0.32727  |
| Slc22a17  | 4.6854506   | 1.013465 | 0.2163   |

|           |             |          |          |
|-----------|-------------|----------|----------|
| Klhl24    | 4.679412987 | 2.250298 | 0.480893 |
| Rab6a     | 4.672803262 | 1.402998 | 0.300248 |
| Pot1b     | 4.64934266  | 0.548779 | 0.118034 |
| Gm28217   | 4.635926166 | 2.247665 | 0.484836 |
| Gm884     | 4.604436972 | 1.977021 | 0.429373 |
| Dynlt3    | 4.578299416 | 1.661689 | 0.362949 |
| Rbm25     | 4.566779133 | 1.765719 | 0.386644 |
| Ugp2      | 4.56563078  | 2.0166   | 0.441691 |
| Srebf1    | 4.558494844 | 1.477821 | 0.324191 |
| Gm20831   | 4.554291774 | 2.081522 | 0.457046 |
| Gm10561   | 4.55379233  | 2.260225 | 0.496339 |
| Ctdsp2    | 4.552954131 | 0.991581 | 0.217788 |
| Rb1       | 4.552654112 | 1.897395 | 0.416767 |
| Drp2      | 4.546553842 | 1.963583 | 0.431884 |
| Gli1      | 4.53977789  | 1.171071 | 0.257958 |
| Ifi27     | 4.537251846 | 1.753117 | 0.386383 |
| Atg3      | 4.531617981 | 1.92374  | 0.424515 |
| Ppp6r3    | 4.530292069 | 2.037934 | 0.449846 |
| Gtf2i     | 4.523990516 | 1.732053 | 0.382859 |
| Degs1     | 4.505019676 | 1.323343 | 0.293748 |
| Tcf25     | 4.502157441 | 2.027434 | 0.450325 |
| Immt      | 4.495105855 | 1.735458 | 0.386077 |
| Huwe1     | 4.489779891 | 0.918438 | 0.204562 |
| Gak       | 4.484031691 | 2.004286 | 0.446983 |
| Cntn1     | 4.483950822 | 1.356163 | 0.302448 |
| Araf      | 4.478399471 | 1.253193 | 0.279831 |
| Rbm6      | 4.476482256 | 2.049534 | 0.457845 |
| Usp8      | 4.474887441 | 1.667332 | 0.372597 |
| Vps13b    | 4.47271796  | 1.437401 | 0.321371 |
| Tax1bp1   | 4.463187197 | 1.644682 | 0.368499 |
| Lrrc16a   | 4.46262047  | 1.924535 | 0.431257 |
| Ccnl1     | 4.461352702 | 1.958536 | 0.439    |
| Mapk4     | 4.450805524 | 1.559971 | 0.350492 |
| Nras      | 4.44717838  | 2.081529 | 0.468056 |
| Mbnl2     | 4.432454694 | 0.737757 | 0.166444 |
| Ece1      | 4.422818646 | 1.729354 | 0.391007 |
| Kmt2e     | 4.41503681  | 1.311858 | 0.297134 |
| Tpt1      | 4.413349834 | 1.828237 | 0.414252 |
| Slitrk2   | 4.411369456 | 0.86952  | 0.197109 |
| Wnk1      | 4.410290072 | 0.850168 | 0.192769 |
| Plxnb1    | 4.409092523 | 1.957051 | 0.443867 |
| Nfia      | 4.40767772  | 1.212535 | 0.275096 |
| Phlpp1    | 4.396755367 | 1.349986 | 0.307041 |
| D83004411 | 4.392764906 | 2.040691 | 0.464557 |
| Cdc42     | 4.389240735 | 1.310843 | 0.298649 |
| Lrpap1    | 4.387050215 | 1.137892 | 0.259375 |
| Hiat1     | 4.377332221 | 1.962908 | 0.448426 |

|           |             |          |          |
|-----------|-------------|----------|----------|
| Hnrnpdl   | 4.376096636 | 1.572635 | 0.359369 |
| ldh3b     | 4.37291058  | 1.635523 | 0.374012 |
| Plcb4     | 4.367518681 | 1.761907 | 0.403411 |
| Eif4g2    | 4.362022428 | 1.650533 | 0.378387 |
| Ccar1     | 4.352770659 | 1.754166 | 0.403    |
| Rorb      | 4.341435679 | 1.293884 | 0.298031 |
| Adi1      | 4.337290944 | 1.93048  | 0.445089 |
| Alcam     | 4.336726569 | 0.844043 | 0.194627 |
| Gm8300    | 4.333685719 | 1.324577 | 0.305647 |
| Nbea      | 4.332054218 | 2.105668 | 0.486067 |
| 6820431F2 | 4.329841551 | 0.811113 | 0.187331 |
| Dzip1     | 4.329615378 | 1.335713 | 0.308506 |
| Nhsl1     | 4.329558956 | 1.823678 | 0.421216 |
| Cd38      | 4.329199799 | 0.97405  | 0.224995 |
| Rpl7a     | 4.327788058 | 1.334927 | 0.308455 |
| Ubn2      | 4.326831219 | 1.177285 | 0.272089 |
| Chd4      | 4.322954436 | 2.119803 | 0.49036  |
| Lgmn      | 4.322082577 | 1.206552 | 0.27916  |
| Rnf20     | 4.317830703 | 0.785748 | 0.181977 |
| Sox6      | 4.312765889 | 2.02968  | 0.470621 |
| Ptpdc1    | 4.308401538 | 2.001789 | 0.464625 |
| Spred1    | 4.307978808 | 1.382447 | 0.320904 |
| Emc3      | 4.307568268 | 1.185603 | 0.275237 |
| Abcc5     | 4.292262021 | 1.09669  | 0.255504 |
| Ywhab     | 4.27568844  | 1.831371 | 0.428322 |
| Ptp4a2    | 4.272041356 | 1.304894 | 0.30545  |
| Anapc5    | 4.260613278 | 1.375667 | 0.32288  |
| Zc3h15    | 4.259874915 | 1.255173 | 0.29465  |
| Sf3a1     | 4.25148545  | 1.927867 | 0.453457 |
| Muc4      | 4.23923911  | 0.644492 | 0.15203  |
| Kpnb1     | 4.238492888 | 1.239637 | 0.292471 |
| Gatm      | 4.236422325 | 1.538434 | 0.363145 |
| Tmx1      | 4.230906248 | 1.122423 | 0.265291 |
| Pdcd5     | 4.229361474 | 1.575231 | 0.372451 |
| Vcl       | 4.216777109 | 1.501264 | 0.356022 |
| Trip11    | 4.216310262 | 1.199331 | 0.28445  |
| Cc2d2a    | 4.210472403 | 1.452604 | 0.344998 |
| Cnot1     | 4.201346487 | 1.230458 | 0.292872 |
| Gna13     | 4.19732901  | 1.317732 | 0.313945 |
| BC005537  | 4.185332028 | 1.600185 | 0.382332 |
| Abcd3     | 4.167969559 | 1.066174 | 0.255802 |
| Nf1       | 4.162504091 | 1.319643 | 0.317031 |
| Atraid    | 4.157727955 | 1.991412 | 0.478967 |
| Crebbp    | 4.156021095 | 1.27851  | 0.307628 |
| Esco1     | 4.155761257 | 0.671581 | 0.161602 |
| St5       | 4.155072505 | 1.784492 | 0.429473 |
| Kat6a     | 4.154011608 | 1.908718 | 0.459488 |

|         |             |          |          |
|---------|-------------|----------|----------|
| Gli2    | 4.152821552 | 1.471    | 0.354217 |
| Tcf20   | 4.141790351 | 1.715753 | 0.414254 |
| Rpl10   | 4.139798689 | 1.071239 | 0.258766 |
| Zfp3    | 4.130602385 | 1.839398 | 0.44531  |
| Reps1   | 4.12399977  | 1.537567 | 0.372834 |
| Kcnc4   | 4.120069126 | 1.938931 | 0.470606 |
| Rpsa    | 4.112910763 | 1.721152 | 0.418475 |
| Ggnbp2  | 4.110367788 | 1.365257 | 0.332149 |
| Ak4     | 4.102088441 | 1.523312 | 0.37135  |
| Insr    | 4.101795201 | 0.989589 | 0.241258 |
| Cxcl14  | 4.09700428  | 1.623854 | 0.396352 |
| Rcn2    | 4.096209098 | 0.920528 | 0.224727 |
| Hivep1  | 4.09554673  | 1.822763 | 0.44506  |
| lqsec1  | 4.095226108 | 1.249723 | 0.305166 |
| Zmym2   | 4.086814644 | 1.703215 | 0.416759 |
| Smpd2   | 4.085790801 | 1.350132 | 0.330446 |
| Ptges3  | 4.083301698 | 1.557146 | 0.381345 |
| Zfp281  | 4.077117655 | 2.008749 | 0.492689 |
| Helz    | 4.065040117 | 1.377416 | 0.338844 |
| Ankrd40 | 4.054398782 | 1.166495 | 0.287711 |
| Gprc5b  | 4.052860103 | 1.47431  | 0.36377  |
| Cirh1a  | 4.043896594 | 1.953321 | 0.483029 |
| Rfx3    | 4.031057637 | 1.050152 | 0.260515 |
| ltp2    | 4.028846193 | 0.912715 | 0.226545 |
| Sema4a  | 4.028200973 | 1.394855 | 0.346272 |
| Hspa4l  | 4.026255436 | 1.687606 | 0.41915  |
| Phyhipl | 4.026047202 | 0.833708 | 0.207079 |
| Ankrd52 | 4.025956108 | 1.610231 | 0.399962 |
| Epas1   | 4.01640447  | 1.316945 | 0.327892 |
| Gm20521 | 4.012444031 | 1.724374 | 0.429757 |
| Asap1   | 4.010888657 | 1.413297 | 0.352365 |
| Dusp11  | 4.009481617 | 0.601967 | 0.150136 |
| Ep300   | 4.008597942 | 0.892318 | 0.222601 |
| Klhl5   | 4.005134246 | 1.307656 | 0.326495 |
| Robo1   | 4.004479918 | 1.615425 | 0.403404 |
| Setd5   | 3.998820369 | 1.650958 | 0.412861 |
| Bod1l   | 3.990065989 | 1.27868  | 0.320466 |
| Tbc1d5  | 3.985431931 | 1.219687 | 0.306036 |
| Gaa     | 3.980113901 | 1.661544 | 0.417462 |
| Sned1   | 3.960615419 | 1.917984 | 0.484264 |
| Gpatch8 | 3.958933127 | 1.119871 | 0.282872 |
| Fasn    | 3.958406572 | 1.968871 | 0.49739  |
| Eif4g3  | 3.947309398 | 0.431259 | 0.109254 |
| Prkar1a | 3.942648482 | 1.781481 | 0.451849 |
| Slc7a11 | 3.9369106   | 1.185191 | 0.301046 |
| Mfsd2a  | 3.930009344 | 0.791049 | 0.201284 |
| Ptprs   | 3.92809475  | 1.26642  | 0.322401 |



|           |             |          |          |
|-----------|-------------|----------|----------|
| Aifm3     | 3.921319563 | 1.028408 | 0.262261 |
| Gm26798   | 3.920903074 | 1.855703 | 0.473285 |
| Rere      | 3.918755324 | 1.562754 | 0.398788 |
| Fus       | 3.917970919 | 1.380419 | 0.35233  |
| Bglap3    | 3.917749473 | 1.242391 | 0.317119 |
| Ino80d    | 3.911506341 | 1.276709 | 0.326398 |
| Phf21a    | 3.910370019 | 0.836057 | 0.213805 |
| Calm2     | 3.908610293 | 1.939823 | 0.496295 |
| Dlst      | 3.903860511 | 1.895561 | 0.485561 |
| Itpkb     | 3.901281358 | 1.192628 | 0.305702 |
| Gm5108    | 3.899122098 | 1.687966 | 0.432909 |
| Zfp280c   | 3.894036716 | 1.902447 | 0.488554 |
| Daam1     | 3.876132822 | 1.879711 | 0.484945 |
| Hsp90aa1  | 3.864441337 | 0.931635 | 0.241079 |
| Ube2d3    | 3.862896507 | 1.218553 | 0.31545  |
| Scamp5    | 3.861486299 | 1.599623 | 0.41425  |
| Trac      | 3.855238851 | 1.751397 | 0.45429  |
| Limk2     | 3.847997603 | 1.183791 | 0.307638 |
| Pan3      | 3.84672408  | 1.833424 | 0.47662  |
| Reep5     | 3.843184406 | 0.877691 | 0.228376 |
| Per3      | 3.843042915 | 1.188195 | 0.309181 |
| Pcmt1d1   | 3.842279155 | 0.898206 | 0.233769 |
| Ctage5    | 3.837957307 | 1.433647 | 0.373544 |
| Gprasp1   | 3.837764077 | 1.258635 | 0.32796  |
| Chst10    | 3.835304113 | 1.255977 | 0.327478 |
| Nsd1      | 3.829495275 | 0.310626 | 0.081114 |
| Ash1l     | 3.823875394 | 1.420933 | 0.371595 |
| Ube2l3    | 3.815989116 | 1.787828 | 0.46851  |
| Atp2b2    | 3.801717001 | 1.30854  | 0.344197 |
| Senp1     | 3.798335715 | 1.02317  | 0.269373 |
| Nr1d2     | 3.796491146 | 1.731625 | 0.456112 |
| Chpt1     | 3.796237678 | 0.673149 | 0.17732  |
| Kcnk1     | 3.794097083 | 0.880257 | 0.232007 |
| Ccdc141   | 3.793151496 | 1.049065 | 0.276568 |
| Dst_1     | 3.791295778 | 1.630824 | 0.430149 |
| Herpud1   | 3.784955152 | 1.885833 | 0.498244 |
| Iqck      | 3.77925669  | 0.762216 | 0.201684 |
| Cfl1      | 3.777452153 | 1.143847 | 0.302809 |
| 4632427E1 | 3.776359594 | 1.729635 | 0.458017 |
| Marf1     | 3.767901287 | 0.367043 | 0.097413 |
| Cd9       | 3.765887893 | 1.41119  | 0.37473  |
| Dpy19l4   | 3.765668392 | 0.912762 | 0.24239  |
| Csnk1a1   | 3.764656454 | 1.530288 | 0.406488 |
| Akap9     | 3.762777216 | 0.566817 | 0.150638 |
| Vps54     | 3.760254893 | 1.709213 | 0.454547 |
| Lrrc58    | 3.753719394 | 0.646101 | 0.172123 |
| Acap2     | 3.744432312 | 1.538212 | 0.4108   |

|          |             |          |          |
|----------|-------------|----------|----------|
| Cnep1r1  | 3.738785001 | 1.689981 | 0.452013 |
| Ak2      | 3.734530855 | 1.531097 | 0.409984 |
| Fubp1    | 3.73126454  | 1.035865 | 0.277618 |
| Mfn2     | 3.730699212 | 1.269146 | 0.34019  |
| Selt     | 3.728041292 | 1.542824 | 0.413843 |
| Pcf11    | 3.726506556 | 1.261123 | 0.33842  |
| Gpt2     | 3.725748262 | 0.993689 | 0.266709 |
| Npat     | 3.72381616  | 1.643791 | 0.441427 |
| Fut9     | 3.703060112 | 1.178562 | 0.318267 |
| Lifr     | 3.701153723 | 1.486974 | 0.40176  |
| Map2k7   | 3.696235499 | 1.585733 | 0.429013 |
| Dgkb     | 3.68961713  | 1.499035 | 0.406285 |
| Xrn2     | 3.689339532 | 1.416603 | 0.383972 |
| Wwtr1    | 3.675985009 | 1.679222 | 0.456809 |
| Csdc2    | 3.674137811 | 1.333303 | 0.362889 |
| Fam214b  | 3.669038621 | 1.444941 | 0.39382  |
| Lrrc4c   | 3.658414404 | 1.567175 | 0.428375 |
| Ids      | 3.657182386 | 1.424433 | 0.389489 |
| Acot11   | 3.654489588 | 1.646235 | 0.450469 |
| Rpl17    | 3.653360576 | 1.442163 | 0.39475  |
| Bmpr1b   | 3.652536107 | 1.059212 | 0.289994 |
| Frs2     | 3.637053373 | 1.81838  | 0.49996  |
| Fam168b  | 3.633776324 | 1.738018 | 0.478295 |
| Aco2     | 3.629921597 | 1.091905 | 0.300807 |
| Prodh    | 3.623415067 | 1.488543 | 0.410812 |
| Cyfip1   | 3.610597369 | 1.381861 | 0.382724 |
| Kcna2    | 3.602326147 | 0.960383 | 0.266601 |
| Plce1    | 3.600560915 | 1.376514 | 0.382305 |
| Gm11033  | 3.600556628 | 1.65631  | 0.460015 |
| Tcp11l1  | 3.597699385 | 1.271277 | 0.353358 |
| Atf2     | 3.596917372 | 1.476622 | 0.410524 |
| Wasl     | 3.589426201 | 0.991175 | 0.276138 |
| Actr2    | 3.587612193 | 1.178022 | 0.328358 |
| Adgrl3   | 3.58667096  | 1.507127 | 0.420202 |
| Zfp318   | 3.586362186 | 1.562996 | 0.435817 |
| Tia1     | 3.58393614  | 0.72929  | 0.203489 |
| Mtx3     | 3.582382204 | 1.097273 | 0.306297 |
| Epb4.1l2 | 3.577784254 | 1.494389 | 0.417686 |
| Hnrnp1   | 3.576236868 | 1.064753 | 0.29773  |
| Puf60    | 3.57109127  | 1.780308 | 0.498533 |
| Srpk2    | 3.569122094 | 1.534696 | 0.429992 |
| Arrb1    | 3.561687653 | 0.676864 | 0.19004  |
| Gm26804  | 3.560171842 | 1.202072 | 0.337645 |
| Tmod2    | 3.560036882 | 0.784868 | 0.220466 |
| Arl6ip1  | 3.559816838 | 1.690461 | 0.474873 |
| Thrsp    | 3.553421813 | 1.721458 | 0.484451 |
| Bbs2     | 3.551585569 | 1.585213 | 0.446339 |

|          |             |          |          |
|----------|-------------|----------|----------|
| Vps4a    | 3.55142477  | 1.425589 | 0.401413 |
| Mrpl16   | 3.551404935 | 1.620355 | 0.456257 |
| Notch3   | 3.541838702 | 1.761981 | 0.497476 |
| Btbd3    | 3.541836579 | 0.975014 | 0.275285 |
| Map1a    | 3.539003237 | 1.203223 | 0.339989 |
| Antxr1   | 3.536669312 | 0.50786  | 0.143598 |
| Irgq     | 3.532397481 | 1.279488 | 0.362215 |
| Ddx3x    | 3.529256668 | 0.517038 | 0.1465   |
| Mir99ahg | 3.529167385 | 1.719147 | 0.487126 |
| Vdac1    | 3.517019136 | 1.153282 | 0.327915 |
| Atxn2l   | 3.511858156 | 0.888721 | 0.253063 |
| Wrn      | 3.511264963 | 1.476829 | 0.420598 |
| AW822073 | 3.51057051  | 1.473209 | 0.41965  |
| Rhoq     | 3.510099855 | 1.750708 | 0.498763 |
| Fnbp1l   | 3.509184029 | 0.801674 | 0.22845  |
| Stk24    | 3.501566657 | 1.646452 | 0.470204 |
| Tmem170l | 3.501323941 | 0.920513 | 0.262904 |
| Hnmt     | 3.495027458 | 1.686431 | 0.482523 |
| Sqstm1   | 3.493189426 | 1.150323 | 0.329305 |
| Brd4     | 3.491267934 | 1.151984 | 0.329962 |
| Ptpm     | 3.488903543 | 0.802885 | 0.230125 |
| Pogz     | 3.487914328 | 1.272156 | 0.364733 |
| Mgst1    | 3.484091529 | 1.73095  | 0.496815 |
| Hnrnpu   | 3.483108239 | 1.34029  | 0.384797 |
| Mrpl21   | 3.479048505 | 1.664154 | 0.478336 |
| Ncstn    | 3.478723403 | 1.604722 | 0.461296 |
| Trim44   | 3.476230654 | 1.217302 | 0.350179 |
| Lrrc59   | 3.469834993 | 1.027676 | 0.296174 |
| Pcdh17   | 3.466601317 | 1.649073 | 0.475703 |
| Rimklb   | 3.464796993 | 0.909339 | 0.262451 |
| Gm9801   | 3.456471151 | 1.482737 | 0.428974 |
| Bmpr2    | 3.455673552 | 0.692228 | 0.200316 |
| Fuca1    | 3.452759722 | 1.1493   | 0.332864 |
| Atp6v0a1 | 3.441194432 | 1.570116 | 0.456271 |
| Kmt2d    | 3.437151461 | 0.463226 | 0.13477  |
| Srgap1   | 3.434288671 | 0.438579 | 0.127706 |
| Dalrd3   | 3.431680555 | 0.98837  | 0.288013 |
| Hmgb1    | 3.431081151 | 1.320654 | 0.384909 |
| Supt6    | 3.426761869 | 0.562847 | 0.16425  |
| Erlin2   | 3.425223854 | 0.918187 | 0.268066 |
| Dtx4     | 3.41228961  | 1.459487 | 0.427715 |
| Arid4a   | 3.40971569  | 0.782724 | 0.229557 |
| Tsr1     | 3.401656021 | 1.038142 | 0.305187 |
| Kat2a    | 3.400466959 | 1.19405  | 0.351143 |
| Cbx3     | 3.399541245 | 0.770797 | 0.226736 |
| Hsd12    | 3.396042325 | 1.109214 | 0.32662  |
| Prdm2    | 3.396028204 | 0.35949  | 0.105856 |

|           |             |          |          |
|-----------|-------------|----------|----------|
| Fam222b   | 3.395876415 | 1.166366 | 0.343465 |
| Slc35b1   | 3.395224926 | 1.370645 | 0.403698 |
| Sos1      | 3.38834333  | 0.992218 | 0.292833 |
| Arsb      | 3.386873391 | 1.117903 | 0.330069 |
| Papola    | 3.383011401 | 0.997196 | 0.294766 |
| Muc6      | 3.382990188 | 1.561871 | 0.461683 |
| Ckap5     | 3.372623132 | 1.344939 | 0.398781 |
| Pccb      | 3.371934221 | 1.680663 | 0.498427 |
| Prrt1     | 3.364906659 | 1.153035 | 0.342665 |
| Cdc40     | 3.364639315 | 1.286307 | 0.382301 |
| Nckap5    | 3.364338337 | 1.253426 | 0.372562 |
| Itsn2     | 3.361058694 | 0.905905 | 0.26953  |
| Nisch     | 3.356381003 | 0.839725 | 0.250188 |
| Gdi2      | 3.355320201 | 1.355467 | 0.403975 |
| Tapt1     | 3.354493166 | 1.029792 | 0.306989 |
| Ctsb      | 3.346005528 | 0.219976 | 0.065743 |
| Fbxo9     | 3.344097851 | 0.887288 | 0.265329 |
| Rpl18a    | 3.343813944 | 1.223389 | 0.365866 |
| Mycbp2    | 3.338128371 | 0.601447 | 0.180175 |
| Usp54     | 3.33149043  | 1.298331 | 0.389715 |
| Ppfia1    | 3.323981406 | 1.374223 | 0.413427 |
| Tmem164   | 3.321949224 | 1.632494 | 0.491427 |
| 4933407K1 | 3.320370419 | 1.415156 | 0.426204 |
| Fstl1     | 3.320360271 | 1.428681 | 0.430279 |
| Chuk      | 3.31877071  | 1.095677 | 0.330145 |
| Cnot4     | 3.311880327 | 0.605179 | 0.18273  |
| Pias1     | 3.310195612 | 0.883681 | 0.266957 |
| Hnrnp3    | 3.309631802 | 1.434619 | 0.433468 |
| Lsm6      | 3.308493186 | 1.151029 | 0.347901 |
| Slc15a2   | 3.306157301 | 0.78228  | 0.236613 |
| Rps23     | 3.295693477 | 1.375477 | 0.417356 |
| Pura      | 3.292663881 | 1.373008 | 0.41699  |
| Cdh2      | 3.291773058 | 1.260049 | 0.382787 |
| Hif3a     | 3.290493327 | 1.54954  | 0.470914 |
| Grm3      | 3.288141352 | 1.337137 | 0.406654 |
| Smap1     | 3.281322108 | 1.087078 | 0.331293 |
| Baz2b     | 3.273975537 | 1.02873  | 0.314214 |
| Itfg1     | 3.273325771 | 0.111611 | 0.034097 |
| Atg9a     | 3.264207845 | 1.479014 | 0.4531   |
| Snrnp200  | 3.263765317 | 1.129168 | 0.345971 |
| Clptm1    | 3.26250076  | 1.238223 | 0.379532 |
| Gabpa     | 3.243717647 | 1.300845 | 0.401035 |
| Rad21     | 3.239233088 | 0.681193 | 0.210295 |
| Rab11fip2 | 3.23661153  | 1.388367 | 0.428957 |
| Eif4a1    | 3.234777286 | 0.851845 | 0.26334  |
| Mapre2    | 3.230109402 | 1.021762 | 0.316324 |
| Rplp2     | 3.227726591 | 1.310646 | 0.406059 |

|           |             |          |          |
|-----------|-------------|----------|----------|
| Gm21833   | 3.226644684 | 1.384866 | 0.429197 |
| Otud5     | 3.224290195 | 1.416643 | 0.439366 |
| Bfar      | 3.221829947 | 1.45488  | 0.45157  |
| Kmt2a     | 3.216264101 | 0.520035 | 0.161689 |
| Adcy8     | 3.214036462 | 1.125056 | 0.350045 |
| Hnrnpd    | 3.209683904 | 1.576014 | 0.491018 |
| Gm4477    | 3.208844829 | 1.544379 | 0.481288 |
| Zfp521    | 3.207589031 | 1.163704 | 0.362797 |
| AA465934  | 3.204195295 | 1.229972 | 0.383863 |
| Fnbp4     | 3.199664762 | 1.34425  | 0.420122 |
| Taf1d     | 3.198101612 | 0.946084 | 0.295827 |
| Chd1      | 3.197803399 | 1.18771  | 0.371414 |
| Zfp384    | 3.195963323 | 1.079401 | 0.337739 |
| Rpn2      | 3.188163345 | 0.901651 | 0.282812 |
| Fgfr1     | 3.182754166 | 1.208092 | 0.379574 |
| Tug1      | 3.180701549 | 1.203415 | 0.378349 |
| Dcun1d5   | 3.179878877 | 1.268823 | 0.399016 |
| Bms1      | 3.169413075 | 1.040575 | 0.328318 |
| Otx2      | 3.158634746 | 1.492493 | 0.472512 |
| Nfatc3    | 3.158251843 | 1.079647 | 0.34185  |
| 1700029F1 | 3.155897789 | 0.687876 | 0.217965 |
| Itga6     | 3.155473361 | 0.988798 | 0.31336  |
| Lair1     | 3.154425281 | 1.289281 | 0.408721 |
| Acp2      | 3.153932177 | 0.9979   | 0.316399 |
| Srsf2     | 3.149824883 | 1.391472 | 0.441762 |
| Zgpat     | 3.146366843 | 1.194687 | 0.379704 |
| Sgip1     | 3.145527574 | 0.748807 | 0.238055 |
| Tspan7    | 3.144724568 | 1.001388 | 0.318434 |
| Ptpn4     | 3.144484169 | 1.103098 | 0.350804 |
| Taf1      | 3.14185604  | 1.1035   | 0.351226 |
| Zfp36l1   | 3.141708053 | 1.343919 | 0.427767 |
| Dtx1      | 3.141656025 | 0.87271  | 0.277787 |
| Usp32     | 3.140979637 | 1.324801 | 0.421779 |
| Bhlhe41   | 3.138933257 | 1.558135 | 0.49639  |
| Ttc1      | 3.133491315 | 0.71111  | 0.226938 |
| Fxr1      | 3.13190319  | 0.98062  | 0.313107 |
| Gabrg1    | 3.130699118 | 1.227411 | 0.392057 |
| Kat6b     | 3.130434511 | 0.520321 | 0.166214 |
| Elk1      | 3.125004409 | 0.898716 | 0.287589 |
| Hsph1     | 3.124025098 | 1.039238 | 0.33266  |
| Zfp687    | 3.124013514 | 1.054524 | 0.337554 |
| Gm14565   | 3.114044296 | 0.870225 | 0.279452 |
| Ybx1      | 3.105983302 | 1.157817 | 0.37277  |
| Grk4      | 3.099755526 | 1.097213 | 0.353968 |
| Spcs3     | 3.097380487 | 1.026431 | 0.331387 |
| Il33      | 3.082223016 | 0.825675 | 0.267883 |
| Tef       | 3.069951555 | 1.113531 | 0.362719 |

|          |             |          |          |
|----------|-------------|----------|----------|
| Lrp1b    | 3.059737515 | 0.604544 | 0.19758  |
| Dnaja2   | 3.057993643 | 1.33049  | 0.435086 |
| Zfp329   | 3.054608424 | 1.356949 | 0.44423  |
| Sp110    | 3.054421458 | 0.798281 | 0.261353 |
| Lonp2    | 3.043205304 | 1.458302 | 0.479199 |
| Rpl11    | 3.036986923 | 1.07187  | 0.352939 |
| Hmgcr    | 3.033248901 | 0.876467 | 0.288953 |
| Zfp608   | 3.033236282 | 1.420505 | 0.468313 |
| Stim1    | 3.032196835 | 1.187891 | 0.391759 |
| Caskin1  | 3.029704869 | 0.45114  | 0.148906 |
| Dock7    | 3.026605929 | 0.927422 | 0.306423 |
| Alg5     | 3.026006157 | 1.402832 | 0.463592 |
| Paqr4    | 3.022525607 | 1.334802 | 0.441618 |
| Chd6     | 3.021427934 | 0.720801 | 0.238563 |
| Vamp2    | 3.021326709 | 1.484423 | 0.491315 |
| Oat      | 3.021280638 | 1.008841 | 0.333912 |
| Ivns1abp | 3.018091971 | 1.504419 | 0.498467 |
| Psm11    | 3.017082773 | 1.335495 | 0.442645 |
| Fam92a   | 3.014236798 | 0.947557 | 0.314361 |
| Ylpm1    | 3.014030404 | 0.951381 | 0.315651 |
| Ankhd1   | 3.009864327 | 0.30958  | 0.102855 |
| Efr3b    | 3.009002547 | 0.929227 | 0.308816 |
| Nln      | 3.008963936 | 1.137968 | 0.378193 |
| Mettl23  | 3.007391801 | 1.26005  | 0.418984 |
| Flrt2    | 2.994188678 | 1.340121 | 0.447574 |
| Slc30a10 | 2.990144244 | 1.48457  | 0.496488 |
| Acsf2    | 2.983019195 | 1.474218 | 0.494203 |
| Tm9sf2   | 2.981467948 | 1.097241 | 0.36802  |
| Gns      | 2.980669305 | 1.152492 | 0.386655 |
| Pip4k2a  | 2.975021741 | 0.826507 | 0.277816 |
| Mboat2   | 2.973572882 | 1.107968 | 0.372605 |
| Tmem131  | 2.972841003 | 1.402737 | 0.471851 |
| Atxn1    | 2.972751685 | 0.973887 | 0.327604 |
| Gm6483   | 2.97213233  | 1.261483 | 0.424437 |
| Tmem176k | 2.969704137 | 1.473291 | 0.496107 |
| Hspa9    | 2.966981492 | 1.156741 | 0.389871 |
| Xpnpep1  | 2.966730166 | 1.280822 | 0.431729 |
| Dclk1    | 2.960163299 | 1.251838 | 0.422895 |
| Bmp2k    | 2.959335067 | 1.467991 | 0.496054 |
| Adgrb3   | 2.956935701 | 1.433878 | 0.48492  |
| Gm14717  | 2.956421404 | 1.313175 | 0.444177 |
| Hp1bp3   | 2.953811669 | 1.136618 | 0.384797 |
| Rnf215   | 2.953282518 | 1.207648 | 0.408917 |
| Lats1    | 2.953007426 | 0.876468 | 0.296805 |
| Bptf     | 2.94980257  | 0.679593 | 0.230386 |
| Zranb2   | 2.944715921 | 0.820233 | 0.278544 |
| Gsk3b    | 2.94300299  | 0.849814 | 0.288757 |

|           |             |          |          |
|-----------|-------------|----------|----------|
| Fah       | 2.942430064 | 0.969231 | 0.329398 |
| Ubr2      | 2.940213776 | 0.958909 | 0.326136 |
| Pabpc1    | 2.935977637 | 0.531683 | 0.181092 |
| Me1       | 2.935352684 | 1.257009 | 0.428231 |
| Magi2     | 2.929037775 | 1.338941 | 0.457127 |
| Nlgn3     | 2.921948182 | 0.228902 | 0.078339 |
| Cpeb2     | 2.919900413 | 0.558311 | 0.191209 |
| Slc30a1   | 2.915478064 | 1.423271 | 0.488178 |
| Sbf2      | 2.909766076 | 1.099789 | 0.377965 |
| Lpp       | 2.909303444 | 1.047275 | 0.359975 |
| Sec61a1   | 2.906441609 | 0.792605 | 0.272706 |
| Nnt       | 2.905925785 | 1.101742 | 0.379136 |
| Chka      | 2.902296713 | 1.304528 | 0.449481 |
| Sptan1    | 2.901615246 | 0.443702 | 0.152915 |
| Fabp5     | 2.898456451 | 1.361859 | 0.469857 |
| Sin3a     | 2.896709065 | 0.962078 | 0.332128 |
| Enpp5     | 2.894870043 | 1.024537 | 0.353915 |
| 4933431E2 | 2.890301255 | 1.111918 | 0.384707 |
| Cops2     | 2.887546017 | 0.715993 | 0.247959 |
| Cipc      | 2.882824385 | 1.393135 | 0.483254 |
| Bcl2      | 2.881543138 | 0.744296 | 0.258298 |
| Etfa      | 2.878796527 | 0.95712  | 0.332472 |
| Pdha1     | 2.878703036 | 1.030596 | 0.358007 |
| Phf12     | 2.878169434 | 1.27217  | 0.442007 |
| Klhl17    | 2.876886527 | 1.231858 | 0.428191 |
| Rpl23a    | 2.875522995 | 1.132879 | 0.393973 |
| Zmat3     | 2.872078553 | 1.100462 | 0.383159 |
| Id2       | 2.871856857 | 1.132171 | 0.39423  |
| Gm10172   | 2.87030948  | 1.243544 | 0.433244 |
| Adgra1    | 2.86991914  | 1.228116 | 0.427927 |
| Atrx      | 2.869290675 | 0.775945 | 0.270431 |
| Gramd3    | 2.867752746 | 1.29491  | 0.451542 |
| Nfasc     | 2.867619963 | 1.074474 | 0.374692 |
| Actn4     | 2.865383627 | 1.055405 | 0.368329 |
| Fbxo18    | 2.8631874   | 1.0862   | 0.379367 |
| Plxdc2    | 2.863167837 | 1.331571 | 0.465069 |
| Itpr1     | 2.861909276 | 0.937292 | 0.327506 |
| Ccdc47    | 2.860087759 | 0.469932 | 0.164307 |
| Psm4      | 2.855696033 | 1.209558 | 0.42356  |
| Dennd5a   | 2.853740802 | 0.67128  | 0.235228 |
| Sltm      | 2.851704524 | 1.091134 | 0.382625 |
| Tcn2      | 2.850448137 | 1.058008 | 0.371173 |
| Ghr       | 2.847386567 | 0.947332 | 0.332702 |
| Plekha1   | 2.844792019 | 0.755971 | 0.265739 |
| Gm4491    | 2.839077544 | 1.410296 | 0.496745 |
| Itgb1     | 2.838859774 | 1.403647 | 0.494441 |
| Tardbp    | 2.83853356  | 0.924806 | 0.325804 |

|           |             |          |          |
|-----------|-------------|----------|----------|
| Pfn1      | 2.834509613 | 1.30609  | 0.460782 |
| Ppt1      | 2.834153718 | 1.413503 | 0.498739 |
| Msi1      | 2.830011111 | 1.203391 | 0.425225 |
| Psg16     | 2.824977882 | 0.823571 | 0.291532 |
| Sp3       | 2.820983623 | 0.717739 | 0.254429 |
| Zfp395    | 2.819356671 | 0.821188 | 0.291268 |
| Nrarp     | 2.814096847 | 0.869937 | 0.309135 |
| Tcea1     | 2.810495496 | 1.092307 | 0.388653 |
| Gtpbp4    | 2.802938878 | 1.38926  | 0.495644 |
| Slc9a3r1  | 2.802131792 | 1.25268  | 0.447045 |
| Cd200     | 2.797791947 | 1.183771 | 0.423109 |
| Gm21874   | 2.791621282 | 0.892593 | 0.31974  |
| Rora      | 2.789860808 | 0.877117 | 0.314394 |
| Sptbn1    | 2.785766666 | 0.972985 | 0.34927  |
| Med12     | 2.782308651 | 0.840514 | 0.302092 |
| Adamts9   | 2.781942759 | 1.034335 | 0.371803 |
| Ogdh      | 2.778170983 | 1.353703 | 0.487264 |
| Impact    | 2.776608519 | 1.280029 | 0.461005 |
| Cdk13     | 2.773766728 | 1.357296 | 0.489333 |
| Tbc1d32   | 2.773359392 | 1.164905 | 0.420034 |
| Prkar2a   | 2.772914651 | 1.125455 | 0.405874 |
| Tnks2     | 2.772299983 | 1.240153 | 0.447337 |
| Zfp263    | 2.771078621 | 1.181257 | 0.426281 |
| Chn1      | 2.769096161 | 0.633273 | 0.228693 |
| Mrpl37    | 2.766548955 | 1.307469 | 0.472599 |
| Snpc3     | 2.761443366 | 1.364293 | 0.494051 |
| Prrc2a    | 2.755392015 | 0.903275 | 0.327821 |
| Gm20917   | 2.752042022 | 1.265753 | 0.459932 |
| RP23-97A1 | 2.748336329 | 1.329822 | 0.483864 |
| Hmgcs1    | 2.748027259 | 0.992414 | 0.361137 |
| Marcks    | 2.74757195  | 0.63858  | 0.232416 |
| Snx32     | 2.743712779 | 0.946472 | 0.34496  |
| E330020D  | 2.742130171 | 1.23065  | 0.448793 |
| Vcan      | 2.740219651 | 1.158515 | 0.422782 |
| Gm20721   | 2.73820627  | 0.834959 | 0.304929 |
| Slc22a4   | 2.732870088 | 1.208436 | 0.442186 |
| Ranbp2    | 2.730479294 | 1.309011 | 0.479407 |
| Arhgef11  | 2.724380317 | 0.901757 | 0.330995 |
| Gli3      | 2.721947259 | 0.981    | 0.360404 |
| Rdx       | 2.718531715 | 0.677397 | 0.249178 |
| Ndufaf4   | 2.718469364 | 0.611878 | 0.225082 |
| Krt7      | 2.718294503 | 1.095603 | 0.403048 |
| Camk2n1   | 2.718219322 | 0.888075 | 0.326712 |
| Ddx6      | 2.716728013 | 0.848667 | 0.312386 |
| Syngap1   | 2.714110913 | 0.960218 | 0.353787 |
| Anapc1    | 2.712953388 | 1.244845 | 0.458852 |
| Aak1      | 2.709127508 | 1.032011 | 0.380938 |



|          |             |          |          |
|----------|-------------|----------|----------|
| Cep95    | 2.706704283 | 1.02503  | 0.378701 |
| Kdm5a    | 2.705305219 | 0.768797 | 0.284181 |
| Kdm3b    | 2.703534587 | 0.92483  | 0.342082 |
| Ganab    | 2.699930104 | 0.989018 | 0.366313 |
| Pou3f4   | 2.695295177 | 1.239475 | 0.459866 |
| Mro      | 2.695057615 | 1.132836 | 0.420338 |
| Stk17b   | 2.68587358  | 1.285729 | 0.4787   |
| Atp6v1e1 | 2.685599546 | 1.066033 | 0.396944 |
| Wdfy3    | 2.685522677 | 0.69028  | 0.257038 |
| Sorbs2   | 2.683957721 | 0.773858 | 0.288327 |
| Zfp326   | 2.680646294 | 0.734413 | 0.273968 |
| Sorcs2   | 2.678242415 | 1.248701 | 0.466239 |
| Zdhhc24  | 2.677811225 | 0.943873 | 0.352479 |
| Prpf18   | 2.675900016 | 0.909365 | 0.339835 |
| Abhd12   | 2.67584366  | 0.941627 | 0.351899 |
| Myadm    | 2.671257827 | 0.931225 | 0.348609 |
| Ildr2    | 2.670707825 | 0.88144  | 0.33004  |
| Fat1     | 2.668079786 | 0.327672 | 0.122812 |
| Ptma     | 2.666224959 | 1.030747 | 0.386594 |
| Rfx7     | 2.665740627 | 0.853924 | 0.320333 |
| Apbb2    | 2.665739961 | 0.696452 | 0.26126  |
| Gm608    | 2.661650362 | 1.065957 | 0.400487 |
| Arhgef28 | 2.658106957 | 0.812099 | 0.305518 |
| Pibf1    | 2.654386293 | 1.220079 | 0.459646 |
| Ndufv1   | 2.65360146  | 0.807515 | 0.304309 |
| Glrx2    | 2.653513336 | 1.18052  | 0.444889 |
| Bzw1     | 2.652530109 | 1.143364 | 0.431047 |
| Rab9     | 2.64727263  | 0.932632 | 0.352299 |
| Vta1     | 2.645265079 | 1.299096 | 0.491102 |
| Ubr4     | 2.643397055 | 0.847574 | 0.320638 |
| Plcb1    | 2.641400537 | 1.160434 | 0.439325 |
| Ncam2    | 2.641023813 | 1.194147 | 0.452153 |
| Sfi1     | 2.640922523 | 1.111983 | 0.421058 |
| Atp6v1a  | 2.640289104 | 1.268714 | 0.480521 |
| Gm29044  | 2.638423344 | 1.230493 | 0.466374 |
| Nudt9    | 2.637521473 | 1.131395 | 0.428962 |
| Rnpc3    | 2.633053859 | 0.512558 | 0.194663 |
| Dcp2     | 2.632324993 | 0.926327 | 0.351904 |
| Ehbp1    | 2.632039743 | 1.12273  | 0.426563 |
| Fzd3     | 2.630961156 | 1.064603 | 0.404644 |
| Mrpl18   | 2.629539728 | 1.286974 | 0.489429 |
| Akap8    | 2.629521393 | 0.688112 | 0.261687 |
| Zcrb1    | 2.628506343 | 1.094133 | 0.416257 |
| Smg5     | 2.627866421 | 1.176121 | 0.447557 |
| Atp6v0b  | 2.625652966 | 0.612232 | 0.233173 |
| Stip1    | 2.619074308 | 1.032531 | 0.394235 |
| Sumo1    | 2.613066309 | 1.09407  | 0.418692 |

|           |             |          |          |
|-----------|-------------|----------|----------|
| Itgav     | 2.607836157 | 0.843649 | 0.323506 |
| Apln      | 2.605550287 | 1.207016 | 0.463248 |
| Itch      | 2.604015834 | 0.716919 | 0.275313 |
| Nup98     | 2.603398743 | 1.29171  | 0.496163 |
| Hcfc1     | 2.603365023 | 0.649015 | 0.249298 |
| Gm2a      | 2.602669008 | 1.03543  | 0.397834 |
| Srp72     | 2.600578888 | 1.116434 | 0.429302 |
| Isy1      | 2.598795376 | 1.158508 | 0.445787 |
| Kansl3    | 2.593111768 | 1.216365 | 0.469075 |
| Arid1a    | 2.591326657 | 0.860952 | 0.332244 |
| Myo10     | 2.591070418 | 0.880306 | 0.339746 |
| Brd9      | 2.588035156 | 0.751354 | 0.290318 |
| Gm3912    | 2.586909262 | 0.867323 | 0.335274 |
| Cltc      | 2.586349847 | 0.910252 | 0.351944 |
| Mllt10    | 2.585835097 | 0.588979 | 0.227771 |
| Psme4     | 2.584925216 | 0.753749 | 0.291594 |
| Glg1      | 2.584083403 | 0.83925  | 0.324777 |
| Mapk1ip1l | 2.583586822 | 0.36592  | 0.141633 |
| Nfib      | 2.582144231 | 0.526779 | 0.204008 |
| 1810013L2 | 2.578913769 | 0.635853 | 0.246558 |
| St8sia2   | 2.576220612 | 1.057515 | 0.410491 |
| Xrn1      | 2.576100354 | 0.932763 | 0.362083 |
| 9930021J0 | 2.575664988 | 0.770207 | 0.299032 |
| Phkb      | 2.569129347 | 1.171902 | 0.456148 |
| Cspp1     | 2.567520262 | 1.02718  | 0.400067 |
| Olfml1    | 2.567215008 | 1.256958 | 0.489619 |
| Etnk1     | 2.565348682 | 0.96375  | 0.37568  |
| Ptpn13    | 2.56385204  | 0.884076 | 0.344823 |
| Tpr       | 2.559668979 | 0.642104 | 0.250854 |
| Sdc3      | 2.559663712 | 0.839408 | 0.327937 |
| Dmxl2     | 2.55742221  | 0.236758 | 0.092577 |
| Kdm3a     | 2.556681939 | 1.020171 | 0.399022 |
| Sox8      | 2.554384081 | 1.222357 | 0.478533 |
| Usp19     | 2.553838376 | 1.129058 | 0.442102 |
| Dpp3      | 2.550682524 | 0.831033 | 0.325808 |
| Gm2012    | 2.543853157 | 0.656215 | 0.257961 |
| Psmd1     | 2.541132028 | 1.243595 | 0.489386 |
| Zc3h7a    | 2.539243162 | 0.6055   | 0.238457 |
| Zfp84     | 2.53547364  | 1.196979 | 0.472093 |
| Gareml    | 2.53195961  | 1.235656 | 0.488024 |
| Eif3e     | 2.531751166 | 1.160188 | 0.458255 |
| Shisa7    | 2.527632343 | 1.199201 | 0.474437 |
| Cul4b     | 2.524422106 | 1.150407 | 0.455711 |
| Nacc2     | 2.52326364  | 0.529122 | 0.209698 |
| Acp6      | 2.519651406 | 1.233612 | 0.489596 |
| Suco      | 2.516346441 | 0.996715 | 0.396096 |
| Mrpl50    | 2.514261164 | 1.236567 | 0.491821 |

|           |             |          |          |
|-----------|-------------|----------|----------|
| Bmpr1a    | 2.513068896 | 1.207834 | 0.480621 |
| Morf4l2   | 2.509861991 | 1.070259 | 0.426422 |
| Plcd4     | 2.508656781 | 0.440847 | 0.17573  |
| C030037Dl | 2.50732275  | 1.136583 | 0.453305 |
| Echdc1    | 2.500843994 | 1.058218 | 0.423144 |
| Tcf4      | 2.498475959 | 0.950237 | 0.380327 |
| Agpat3    | 2.49555803  | 0.618057 | 0.247663 |
| Sgta      | 2.494982694 | 1.090357 | 0.43702  |
| Rrbp1     | 2.494181526 | 0.714183 | 0.28634  |
| Tlk2      | 2.493922887 | 1.040665 | 0.41728  |
| Negr1     | 2.492776181 | 0.532407 | 0.21358  |
| Mfap1b    | 2.488179656 | 1.058723 | 0.425501 |
| Rapgef3   | 2.486831513 | 1.109395 | 0.446108 |
| Tnfaip1   | 2.486462367 | 1.239784 | 0.498613 |
| Clec2e    | 2.483826914 | 0.75796  | 0.305158 |
| Hist2h3c1 | 2.483477187 | 0.851142 | 0.342722 |
| Gnai3     | 2.483061345 | 0.985371 | 0.396837 |
| Slu7      | 2.479167529 | 1.055923 | 0.425918 |
| Prelp     | 2.47841869  | 1.1257   | 0.454201 |
| Rab14     | 2.478348455 | 1.000125 | 0.403545 |
| Ric1      | 2.474282787 | 1.181391 | 0.477468 |
| Acaca     | 2.473501278 | 0.53326  | 0.215589 |
| Tex9      | 2.471374953 | 1.061285 | 0.429431 |
| Gm16026   | 2.47010169  | 1.2071   | 0.488684 |
| Brd2      | 2.467232816 | 0.557838 | 0.226098 |
| Nr2c2     | 2.466704723 | 0.922956 | 0.374166 |
| Ehmt1     | 2.464849435 | 0.955471 | 0.387639 |
| Acad9     | 2.463334611 | 1.177036 | 0.477822 |
| Sema6a    | 2.462561651 | 1.21079  | 0.491679 |
| Bpgm      | 2.459470915 | 1.123024 | 0.456612 |
| Kdm5b     | 2.459373783 | 0.813315 | 0.3307   |
| Pld2      | 2.455603224 | 0.505678 | 0.205928 |
| Add1      | 2.45081958  | 0.758222 | 0.309375 |
| Wac       | 2.450602332 | 0.946455 | 0.386213 |
| Fam208a   | 2.450339917 | 1.166417 | 0.476023 |
| Fkbp8     | 2.446468502 | 1.028312 | 0.420325 |
| Lhfp      | 2.445816107 | 0.803673 | 0.328591 |
| Tnrc6a    | 2.443973282 | 0.375853 | 0.153788 |
| Dnaja1    | 2.443357079 | 0.895711 | 0.36659  |
| Tet2      | 2.443139567 | 0.337059 | 0.137962 |
| Tmem87a   | 2.443033325 | 1.119507 | 0.458245 |
| Secisbp2l | 2.441635342 | 0.938823 | 0.384506 |
| Atf6      | 2.43762572  | 0.589107 | 0.241672 |
| Cdk19     | 2.436630374 | 0.763147 | 0.313198 |
| Ggps1     | 2.436561448 | 0.955266 | 0.392055 |
| Mfap3l    | 2.435520737 | 0.992031 | 0.407318 |
| Sec24b    | 2.430440613 | 0.517242 | 0.212818 |

|          |             |          |          |
|----------|-------------|----------|----------|
| Fam120a  | 2.429968661 | 0.690463 | 0.284145 |
| Taok1    | 2.427912557 | 0.709582 | 0.29226  |
| Trp53bp1 | 2.423889996 | 0.858793 | 0.354304 |
| Wapal    | 2.42131075  | 0.789802 | 0.326188 |
| Srsf7    | 2.419636524 | 0.899363 | 0.371694 |
| Aup1     | 2.419382488 | 1.055646 | 0.436329 |
| Ppp2r2a  | 2.417107875 | 0.936352 | 0.387385 |
| Cdc42bpa | 2.414733752 | 0.610646 | 0.252884 |
| Clpx     | 2.41387831  | 0.811651 | 0.336243 |
| Tmed10   | 2.412887257 | 0.964625 | 0.39978  |
| BC003331 | 2.411881258 | 0.856822 | 0.35525  |
| Gm9881   | 2.409611585 | 1.114773 | 0.462636 |
| Fh1      | 2.406091718 | 1.156151 | 0.48051  |
| Gpx4     | 2.403740586 | 1.164839 | 0.484594 |
| Exoc1    | 2.402619796 | 0.905777 | 0.376996 |
| Ppp1r2   | 2.401475388 | 1.125783 | 0.468788 |
| Pltp     | 2.400308747 | 0.615453 | 0.256406 |
| Tfg      | 2.398308414 | 0.977563 | 0.407605 |
| Fam168a  | 2.3957432   | 0.713198 | 0.297694 |
| Ythdc1   | 2.394875518 | 0.569319 | 0.237724 |
| Muc3     | 2.391893198 | 1.033488 | 0.43208  |
| Tox      | 2.390667745 | 0.949023 | 0.39697  |
| Wwc1     | 2.389405431 | 0.783768 | 0.328018 |
| Ptprd    | 2.386349317 | 0.418657 | 0.175438 |
| Smarca2  | 2.386188053 | 0.564947 | 0.236757 |
| Dync1h1  | 2.377929235 | 0.738904 | 0.310734 |
| Usp15    | 2.373920468 | 0.9619   | 0.405195 |
| 5430403G | 2.367690298 | 0.897455 | 0.379042 |
| Snx5     | 2.367497554 | 0.940091 | 0.397082 |
| Med23    | 2.366480677 | 0.761618 | 0.321836 |
| Tspan5   | 2.361795594 | 0.698058 | 0.295562 |
| Zeb2     | 2.361373543 | 0.387328 | 0.164026 |
| Abi1     | 2.360861387 | 0.575706 | 0.243854 |
| Opa3     | 2.360753456 | 0.735911 | 0.311727 |
| Erbb4    | 2.360590551 | 0.27276  | 0.115547 |
| Dido1    | 2.359427848 | 0.661347 | 0.2803   |
| Metap2   | 2.3586411   | 0.541371 | 0.229527 |
| Actr3b   | 2.358502769 | 1.135593 | 0.481489 |
| Asap2    | 2.353409488 | 0.724328 | 0.307778 |
| Tnfrsf19 | 2.352579684 | 0.974243 | 0.414117 |
| Gnai2    | 2.349918051 | 1.00171  | 0.426275 |
| Mapk8ip3 | 2.34402857  | 1.01127  | 0.431424 |
| Tial1    | 2.335927109 | 0.898012 | 0.384435 |
| Pik3ip1  | 2.334618177 | 1.085637 | 0.465017 |
| Tubb4b   | 2.334311389 | 0.783847 | 0.335794 |
| Srcap_1  | 2.332677349 | 0.69478  | 0.297846 |
| Kansl1l  | 2.331490883 | 0.709126 | 0.304151 |

|            |             |          |          |
|------------|-------------|----------|----------|
| Klf3       | 2.327872109 | 0.910298 | 0.391043 |
| Cisd2      | 2.326808863 | 0.933332 | 0.401121 |
| Rbm26      | 2.324943571 | 0.944968 | 0.406448 |
| Agfg1      | 2.322593649 | 0.819641 | 0.352899 |
| Tbp        | 2.316066338 | 1.157578 | 0.499804 |
| Usp31      | 2.315066559 | 0.865931 | 0.374041 |
| Scaf4      | 2.31391798  | 0.795856 | 0.343943 |
| Rnf19a     | 2.313859667 | 1.059358 | 0.457832 |
| Creb3l2    | 2.313386914 | 1.092406 | 0.472211 |
| Cdc42bpb   | 2.310388333 | 1.054866 | 0.456575 |
| Pcm1       | 2.310223916 | 0.68501  | 0.296512 |
| Ddb2       | 2.309605166 | 0.735031 | 0.318249 |
| Dhx15      | 2.308766274 | 0.357733 | 0.154946 |
| D5Erttd579 | 2.306485727 | 0.193796 | 0.084022 |
| Zbp1       | 2.305969708 | 0.906321 | 0.393032 |
| Thrap3     | 2.305166166 | 1.105816 | 0.479712 |
| BC005561   | 2.302717066 | 0.44275  | 0.192273 |
| Spen       | 2.300110307 | 1.070536 | 0.465428 |
| Zhx3       | 2.299594402 | 0.446724 | 0.194262 |
| Slc20a1    | 2.297605189 | 0.501592 | 0.218311 |
| Sort1      | 2.296400531 | 1.003552 | 0.437011 |
| Al849053   | 2.291690007 | 1.063104 | 0.463895 |
| Hint3      | 2.291430016 | 1.084277 | 0.473188 |
| Snx25      | 2.290069307 | 0.944652 | 0.412499 |
| Mink1      | 2.288393716 | 0.726377 | 0.317418 |
| Fam98b     | 2.288289507 | 1.060012 | 0.463234 |
| Zfp955b    | 2.287750826 | 0.936886 | 0.409523 |
| Snw1       | 2.286344708 | 1.069638 | 0.467838 |
| Spred2     | 2.285071824 | 0.84415  | 0.36942  |
| AW549877   | 2.283492115 | 0.630089 | 0.275932 |
| Ndr3       | 2.282924399 | 0.971792 | 0.425678 |
| Stk38l     | 2.279458372 | 0.895455 | 0.392837 |
| Ppp2r3a    | 2.279313463 | 0.678081 | 0.297493 |
| Stx17      | 2.277162609 | 1.123931 | 0.493566 |
| Midn       | 2.274748783 | 1.067353 | 0.469218 |
| Pias3      | 2.274380615 | 0.979305 | 0.430581 |
| Gdap111    | 2.267028173 | 0.900891 | 0.397388 |
| Zfp568     | 2.266809439 | 1.001182 | 0.44167  |
| Dennd6a    | 2.265951876 | 0.463108 | 0.204377 |
| Smox       | 2.263353678 | 1.055243 | 0.46623  |
| Smg6       | 2.262238716 | 0.626502 | 0.276939 |
| Map3k19    | 2.258237289 | 0.999189 | 0.442464 |
| Heyl       | 2.258070393 | 1.111177 | 0.492092 |
| Trio       | 2.255770226 | 0.828056 | 0.367084 |
| Tra2b      | 2.255352856 | 0.963759 | 0.427321 |
| Mut        | 2.247323882 | 0.516769 | 0.229949 |
| Cmip       | 2.246321051 | 0.808475 | 0.359911 |

|           |             |          |          |
|-----------|-------------|----------|----------|
| BC030336  | 2.246123643 | 0.974838 | 0.434009 |
| B230307C  | 2.242277308 | 1.091789 | 0.486911 |
| Fer       | 2.241241423 | 0.920659 | 0.410781 |
| Ppil4     | 2.240470831 | 0.887781 | 0.396247 |
| Htatsf1   | 2.239570204 | 0.832689 | 0.371808 |
| Gm5934    | 2.23931691  | 0.632958 | 0.282657 |
| Tnpo1     | 2.238252928 | 1.064052 | 0.475394 |
| Zfp609    | 2.235260819 | 0.637169 | 0.285054 |
| Dleu2     | 2.235231939 | 0.929151 | 0.415684 |
| Ermp1     | 2.234788164 | 0.767855 | 0.343592 |
| Edem3     | 2.232566092 | 0.829943 | 0.371744 |
| Sypl      | 2.232144307 | 0.712065 | 0.319005 |
| Fam20a    | 2.231944981 | 0.85613  | 0.38358  |
| Tulp4     | 2.231197289 | 0.542346 | 0.243074 |
| R3hdm1    | 2.22638313  | 0.603473 | 0.271055 |
| Megf10    | 2.226304786 | 0.614356 | 0.275953 |
| Chst1     | 2.224946623 | 0.720056 | 0.323629 |
| Clstn1    | 2.222234705 | 0.493206 | 0.221941 |
| Cdk11b    | 2.221356294 | 0.59493  | 0.267823 |
| Zfp462    | 2.221342534 | 0.468882 | 0.21108  |
| Agpat5    | 2.218156299 | 0.565915 | 0.255128 |
| Cflar     | 2.217279059 | 1.018157 | 0.459192 |
| Ncl       | 2.21534968  | 0.926866 | 0.418384 |
| Clock     | 2.215209858 | 0.403528 | 0.182162 |
| Ssbp2     | 2.215019886 | 0.679328 | 0.306692 |
| Cit       | 2.213603747 | 0.44228  | 0.199801 |
| Tmed5     | 2.213526461 | 0.574428 | 0.259508 |
| Bmp7      | 2.21320164  | 0.851637 | 0.384799 |
| Dlg5      | 2.210968939 | 0.769394 | 0.347989 |
| Crtc3     | 2.210360556 | 1.022142 | 0.462432 |
| Abhd4     | 2.208309333 | 0.678466 | 0.307233 |
| Vmn2r-ps5 | 2.203234938 | 0.61788  | 0.280442 |
| Tmem220   | 2.202034959 | 0.809061 | 0.367415 |
| Hspb11    | 2.199120693 | 0.748916 | 0.340552 |
| Slc20a2   | 2.197196421 | 0.767794 | 0.349443 |
| Gpr19     | 2.19686103  | 0.69635  | 0.316975 |
| Gm20914   | 2.189386579 | 0.809854 | 0.3699   |
| Dctn2     | 2.187765243 | 1.032488 | 0.471937 |
| Nufip2    | 2.182849034 | 0.950634 | 0.435502 |
| Pisd-ps1  | 2.181348164 | 1.005262 | 0.460844 |
| Nap111    | 2.178575636 | 0.467198 | 0.214451 |
| Golga4    | 2.178478363 | 0.819176 | 0.376031 |
| Jarid2    | 2.177185908 | 0.81972  | 0.376504 |
| Ttyh3     | 2.175846453 | 0.524741 | 0.241166 |
| Gmfb      | 2.175620614 | 1.030984 | 0.473881 |
| B3galt5   | 2.173002286 | 1.062023 | 0.488735 |
| Abhd14b   | 2.169902002 | 1.040384 | 0.479461 |

|          |             |          |          |
|----------|-------------|----------|----------|
| Nrf1     | 2.168046049 | 0.795768 | 0.367044 |
| Fbxw11   | 2.163012703 | 0.70241  | 0.324737 |
| Ilkap    | 2.162629989 | 0.918659 | 0.424788 |
| Serbp1   | 2.158903037 | 0.573229 | 0.265518 |
| Mapk10   | 2.158709303 | 0.509379 | 0.235965 |
| Gpr155   | 2.157637185 | 1.04215  | 0.483005 |
| Atad2b   | 2.15558911  | 0.905949 | 0.420279 |
| Ankrd12  | 2.153927274 | 0.518067 | 0.240522 |
| Eif5b    | 2.153550618 | 0.638916 | 0.29668  |
| 4932438A | 2.151529364 | 0.442276 | 0.205563 |
| Abi2     | 2.150881537 | 0.860652 | 0.400139 |
| Rabep1   | 2.14981798  | 0.54043  | 0.251384 |
| Dhcr24   | 2.148891956 | 0.972713 | 0.452658 |
| Aff1     | 2.148668304 | 0.856387 | 0.398566 |
| Olfr681  | 2.148142776 | 0.975273 | 0.454007 |
| Dctn6    | 2.14770198  | 1.058144 | 0.492687 |
| Tns3     | 2.147065865 | 0.815447 | 0.379796 |
| Max      | 2.146777826 | 0.766354 | 0.356979 |
| Gng12    | 2.146567758 | 0.652377 | 0.303916 |
| Hnrnpf   | 2.146016013 | 1.056846 | 0.492469 |
| Rala     | 2.145761589 | 0.805695 | 0.375482 |
| Anapc16  | 2.143764358 | 0.893573 | 0.416824 |
| Ctnnb1   | 2.142085094 | 0.556772 | 0.25992  |
| Kdm4c    | 2.140013703 | 0.901794 | 0.421397 |
| Pfdn5    | 2.138202445 | 0.844751 | 0.395075 |
| Pcdh19   | 2.137688555 | 0.989241 | 0.462762 |
| Tfdp1    | 2.135708421 | 1.042302 | 0.488036 |
| Lrrc4b   | 2.135159801 | 0.91156  | 0.426928 |
| Smc5     | 2.1350967   | 0.871725 | 0.408284 |
| Dpf2     | 2.133328033 | 1.047382 | 0.490961 |
| Gm904    | 2.131218349 | 0.926796 | 0.434867 |
| Rftn2    | 2.130671246 | 0.705386 | 0.331063 |
| Tspan31  | 2.130174079 | 0.615141 | 0.288775 |
| Gltsr1   | 2.128251802 | 0.618163 | 0.290456 |
| Pla2g16  | 2.128093512 | 0.719609 | 0.338147 |
| Arhgap35 | 2.127078622 | 0.987248 | 0.464133 |
| Larp1    | 2.126923081 | 1.006876 | 0.473396 |
| Gm16630  | 2.124577011 | 0.860579 | 0.405059 |
| Cachd1   | 2.123418688 | 1.017281 | 0.479077 |
| Ccnk     | 2.123134056 | 0.867917 | 0.408791 |
| Gab1     | 2.122183442 | 0.687806 | 0.324103 |
| Slc25a36 | 2.121830083 | 0.696627 | 0.328314 |
| Lbh      | 2.119420504 | 0.9386   | 0.442857 |
| Cers2    | 2.11797769  | 0.493391 | 0.232954 |
| Akap6    | 2.116385943 | 0.51349  | 0.242626 |
| Cops3    | 2.116310012 | 0.796591 | 0.376406 |
| Birc6    | 2.115636839 | 0.731958 | 0.345975 |

|          |             |          |          |
|----------|-------------|----------|----------|
| Xirp2    | 2.113445142 | 0.826009 | 0.390835 |
| Phip     | 2.111734721 | 0.816738 | 0.386762 |
| Avl9     | 2.108306742 | 0.751317 | 0.35636  |
| Sik3     | 2.106046917 | 0.906639 | 0.430493 |
| Ppia     | 2.105262779 | 0.681442 | 0.323685 |
| Dynll1   | 2.103369529 | 0.966515 | 0.459508 |
| Spns1    | 2.101874706 | 0.61637  | 0.293248 |
| Eif4g1   | 2.100761513 | 0.651444 | 0.310099 |
| Golgb1   | 2.099144664 | 0.900405 | 0.428939 |
| Pcbp2    | 2.098174255 | 1.048583 | 0.49976  |
| Cul4a    | 2.097576996 | 0.964792 | 0.459955 |
| Dnm2     | 2.09448909  | 0.610216 | 0.291344 |
| Arhgap12 | 2.092480008 | 0.831713 | 0.397477 |
| Med15    | 2.091860907 | 0.676511 | 0.323401 |
| Orc4     | 2.089753821 | 0.408874 | 0.195656 |
| Rnf220   | 2.088597508 | 0.856651 | 0.410156 |
| Cds2     | 2.087908902 | 0.665088 | 0.318543 |
| Ighv1-37 | 2.08319153  | 0.930214 | 0.446533 |
| Xbp1     | 2.081087048 | 0.260944 | 0.125388 |
| Cic      | 2.080143318 | 0.84675  | 0.407063 |
| Atg2b    | 2.077967525 | 0.824144 | 0.396611 |
| Scaf8    | 2.077062367 | 0.911256 | 0.438724 |
| Larp4    | 2.076194233 | 0.809938 | 0.390107 |
| Strn3    | 2.076129082 | 0.815093 | 0.392602 |
| Zfp788   | 2.074682322 | 0.474253 | 0.228591 |
| Hipk1    | 2.074436311 | 0.718942 | 0.346572 |
| Atrn     | 2.07283795  | 0.461553 | 0.222667 |
| Usp16    | 2.071616908 | 0.521178 | 0.25158  |
| Zfr      | 2.069141962 | 0.655911 | 0.316997 |
| Arhgef26 | 2.067991795 | 0.747104 | 0.36127  |
| Arcn1    | 2.066839256 | 0.805642 | 0.389794 |
| Usp53    | 2.066417446 | 0.794357 | 0.384413 |
| Mecp2    | 2.06627869  | 0.817367 | 0.395574 |
| Usp38    | 2.065470918 | 0.955141 | 0.462432 |
| Pkp4     | 2.064939276 | 0.369341 | 0.178863 |
| Sec16a   | 2.064499898 | 0.632842 | 0.306535 |
| Tpgs2    | 2.060817399 | 0.95921  | 0.465451 |
| Agrn     | 2.060564926 | 0.627332 | 0.304446 |
| Prrc2b   | 2.059087515 | 0.362616 | 0.176105 |
| Rdh5     | 2.057306636 | 0.949824 | 0.461683 |
| Atxn7    | 2.054833426 | 0.896646 | 0.436359 |
| Atn1     | 2.053048742 | 0.88699  | 0.432035 |
| Cluh     | 2.0528555   | 0.969914 | 0.472471 |
| Arhgap42 | 2.050850359 | 0.670186 | 0.326784 |
| Nptn     | 2.050749697 | 0.59581  | 0.290533 |
| Pigb     | 2.048193746 | 0.888843 | 0.433964 |
| Cpsf6    | 2.047458097 | 0.726766 | 0.35496  |



|          |             |          |          |
|----------|-------------|----------|----------|
| Gpi1     | 2.047282374 | 0.950936 | 0.464487 |
| Dctn5    | 2.047133647 | 0.934108 | 0.456301 |
| Dus3l    | 2.047120668 | 0.851899 | 0.416145 |
| 50314340 | 2.045542181 | 0.75248  | 0.367863 |
| Calu     | 2.043379728 | 0.849946 | 0.415951 |
| Camk1d   | 2.042767534 | 0.52818  | 0.258561 |
| Kpna6    | 2.042695111 | 0.920559 | 0.450659 |
| Fyco1    | 2.042333131 | 0.941064 | 0.460779 |
| Sidt2    | 2.04163696  | 0.93271  | 0.456844 |
| Nol4     | 2.040554176 | 0.743884 | 0.36455  |
| Tnrc6b   | 2.040173486 | 0.729764 | 0.357697 |
| Tsc1     | 2.038502919 | 0.56629  | 0.277797 |
| Dcaf8    | 2.038416981 | 0.473809 | 0.23244  |
| Nup93    | 2.037667753 | 0.525934 | 0.258106 |
| Tbce     | 2.036994441 | 0.868908 | 0.426564 |
| Ulk1     | 2.035606758 | 0.755587 | 0.371185 |
| Rc3h1    | 2.035164454 | 0.649888 | 0.319329 |
| Smek2    | 2.0303046   | 0.682374 | 0.336094 |
| Hnrnpul2 | 2.028765064 | 0.811162 | 0.399831 |
| Pum1     | 2.027742773 | 0.92253  | 0.454954 |
| Snx13    | 2.02756606  | 0.940019 | 0.46362  |
| Bsg      | 2.025468488 | 0.765424 | 0.3779   |
| Rcbtb1   | 2.024780642 | 0.963629 | 0.475918 |
| Rpl31    | 2.021957    | 0.956906 | 0.473257 |
| Dnah7b   | 2.021017707 | 0.835614 | 0.413462 |
| Trpm7    | 2.020120813 | 0.623292 | 0.308542 |
| Peli2    | 2.016613921 | 0.621646 | 0.308262 |
| Nabl     | 2.011401022 | 0.362716 | 0.18033  |
| Eif2a    | 2.008432422 | 0.75334  | 0.375088 |
| Specc1   | 2.007034707 | 0.850825 | 0.423921 |
| Reep3    | 2.006248873 | 0.717514 | 0.35764  |
| Ctsf     | 2.003635811 | 0.914417 | 0.456379 |
| Atp5o    | 2.003562986 | 0.969025 | 0.483651 |
